# Supplementary material for: Conformational control allows for [3,3]-sigmatropic rearrangements to proceed with torquoselectivity
Source: Royal Society of Chemistry journal article supplement (doi:10.1039/c6ra10789c), 2016-01-01
Supplement: c6ra10789c1.pdf [file c6ra10789c1.pdf]

# Conformational Control Allows for [3,3]-Sigmatropic Rearrangements to Proceed with Torquoselectivity.

Roberto Villar López,<sup>b</sup> Olalla Nieto Faza<sup>b</sup> and Carlos Silva López<sup>a†</sup>

June 16, 2016

a. Departamento de Química Orgánica, Universidade de Vigo, Lagoas Marcosende,  
36310, Vigo, Galicia, Spain

b. Departamento de Química Orgánica, Universidad de Vigo, Campus Universitario,  
Ourense, Spain.

<sup>†</sup>*Correspondence: carlos.silva@uvigo.es*

## Contents

|          |                                   |             |
|----------|-----------------------------------|-------------|
| <b>1</b> | <b>Gaussian reference</b>         | <b>S-1</b>  |
| <b>2</b> | <b>Cartesian Coordinates</b>      | <b>S-2</b>  |
| <b>3</b> | <b>NBO Secondary Interactions</b> | <b>S-42</b> |
|          | <b>References</b>                 | <b>S-42</b> |

## 1 Gaussian reference

See References section at the end of this document (cite 1)

## **2 Cartesian Coordinates**

Geometries: M06-2X/Def2TZVPP

SCF energies: M06-2X/Def2TZVPP

**1 CH3**

SCF Energy: -311.961834649

Num. Imaginary Frequencies: 0

|   |           |           |           |
|---|-----------|-----------|-----------|
| C | -2.558937 | 1.722721  | -0.213787 |
| C | -1.801911 | 0.781036  | 0.332446  |
| C | -2.025562 | -0.690820 | 0.171586  |
| C | -0.828884 | -1.400237 | -0.482526 |
| C | 0.403867  | -1.352534 | 0.382199  |
| C | 1.506979  | -0.733335 | 0.067165  |
| C | 2.599124  | -0.099556 | -0.256616 |
| H | 0.344514  | -1.857694 | 1.343518  |
| H | -0.616705 | -0.945375 | -1.450454 |
| H | -2.920183 | -0.862029 | -0.428967 |
| H | -0.943096 | 1.071904  | 0.931021  |
| H | -2.345997 | 2.774202  | -0.072650 |
| H | -1.098489 | -2.443660 | -0.659287 |
| H | -2.200642 | -1.143203 | 1.152575  |
| C | 2.869942  | 1.345168  | 0.062405  |
| H | 3.372299  | -0.642971 | -0.792309 |
| H | -3.421089 | 1.469676  | -0.820536 |
| H | 3.050641  | 1.911303  | -0.852275 |
| H | 2.029457  | 1.793002  | 0.588575  |
| H | 3.761577  | 1.440193  | 0.683567  |

**1 CHO**

SCF Energy: -385.986347504

Num. Imaginary Frequencies: 0

|   |           |           |           |
|---|-----------|-----------|-----------|
| C | -2.554872 | 2.025559  | -0.225462 |
| C | -2.020646 | 0.958655  | 0.352234  |
| C | -2.491518 | -0.446988 | 0.138522  |
| C | -1.418468 | -1.338709 | -0.504966 |
| C | -0.217064 | -1.508951 | 0.388228  |
| C | 0.982577  | -1.121420 | 0.086375  |
| C | 2.184584  | -0.690379 | -0.215960 |
| H | -0.373217 | -1.978088 | 1.356521  |
| H | -1.109898 | -0.917139 | -1.461039 |
| H | -3.376180 | -0.445141 | -0.499310 |
| H | -1.173757 | 1.086249  | 1.020680  |
| H | -2.170436 | 3.020467  | -0.043743 |
| H | -1.846297 | -2.324293 | -0.696305 |
| H | -2.780438 | -0.888094 | 1.096814  |
| C | 2.575179  | 0.678147  | 0.143647  |
| H | 2.910251  | -1.311655 | -0.727617 |
| H | -3.399314 | 1.936296  | -0.899427 |
| O | 3.660279  | 1.152522  | -0.097951 |
| H | 1.798423  | 1.265739  | 0.661330  |

**1 CN**

SCF Energy: -364.904643696

Num. Imaginary Frequencies: 0

|   |           |           |           |
|---|-----------|-----------|-----------|
| C | -2.395470 | 1.995300  | -0.271490 |
| C | -1.822176 | 0.955055  | 0.317097  |
| C | -2.313479 | -0.456036 | 0.210515  |
| C | -1.282083 | -1.391769 | -0.439079 |
| C | -0.044083 | -1.530141 | 0.407676  |
| C | 1.133171  | -1.121992 | 0.055513  |
| C | 2.319896  | -0.709491 | -0.317424 |
| H | -0.154230 | -1.980263 | 1.391091  |
| H | -1.014350 | -1.020715 | -1.427619 |
| H | -3.231730 | -0.482374 | -0.377186 |
| H | -0.926616 | 1.109915  | 0.912594  |
| H | -1.995611 | 2.995381  | -0.169026 |
| H | -1.725797 | -2.381124 | -0.560003 |
| H | -2.552014 | -0.839808 | 1.206595  |
| C | 2.751955  | 0.626325  | -0.040879 |
| H | 3.013502  | -1.353550 | -0.843241 |
| H | -3.288603 | 1.878214  | -0.874700 |
| N | 3.112723  | 1.695831  | 0.172846  |

**1 F**

SCF Energy: -371.895974492

Num. Imaginary Frequencies: 0

|   |           |           |           |
|---|-----------|-----------|-----------|
| C | -2.670428 | 1.626046  | -0.207961 |
| C | -1.866311 | 0.728197  | 0.343969  |
| C | -1.990348 | -0.752249 | 0.153860  |
| C | -0.741997 | -1.369683 | -0.497318 |
| C | 0.466785  | -1.256252 | 0.388573  |
| C | 1.548474  | -0.593859 | 0.092951  |
| C | 2.638659  | 0.032621  | -0.230237 |
| F | 2.817565  | 1.345694  | 0.057732  |
| H | 0.409489  | -1.754277 | 1.354210  |
| H | -0.545401 | -0.890334 | -1.455797 |
| H | -2.860306 | -0.971365 | -0.466184 |
| H | -1.045471 | 1.065898  | 0.970576  |
| H | -2.532513 | 2.686683  | -0.044676 |
| H | -0.933453 | -2.428564 | -0.683197 |
| H | -2.150565 | -1.235126 | 1.122367  |
| H | 3.488433  | -0.398968 | -0.738295 |
| H | -3.497300 | 1.325872  | -0.841608 |

**1 H**

SCF Energy: -272.651084463

Num. Imaginary Frequencies: 0

## 2 CARTESIAN COORDINATES

|   |           |           |           |
|---|-----------|-----------|-----------|
| C | -2.639801 | 1.203007  | -0.181602 |
| C | -1.630460 | 0.528714  | 0.351836  |
| C | -1.365275 | -0.927310 | 0.123725  |
| C | 0.008730  | -1.184839 | -0.514042 |
| C | 1.143316  | -0.785726 | 0.393021  |
| C | 2.024747  | 0.131645  | 0.116447  |
| C | 2.902866  | 1.048832  | -0.172788 |
| H | 1.211609  | -1.296728 | 1.350116  |
| H | 0.085035  | -0.644413 | -1.457803 |
| H | -2.143862 | -1.345771 | -0.515687 |
| H | -0.924150 | 1.049522  | 0.992308  |
| H | -2.780786 | 2.258590  | 0.009871  |
| H | 0.094133  | -2.250646 | -0.736099 |
| H | -1.407419 | -1.460173 | 1.078614  |
| H | 2.736745  | 2.086163  | 0.091015  |
| H | 3.825278  | 0.800802  | -0.683488 |
| H | -3.361323 | 0.716718  | -0.828431 |

### 1 NH2

SCF Energy: -328.009257931

Num. Imaginary Frequencies: 0

|   |           |           |           |
|---|-----------|-----------|-----------|
| C | 2.612519  | 1.689813  | 0.218399  |
| C | 1.830519  | 0.768348  | -0.327194 |
| C | 2.019922  | -0.709022 | -0.172178 |
| C | 0.810258  | -1.391529 | 0.487240  |
| C | -0.423136 | -1.316702 | -0.374781 |
| C | -1.514962 | -0.672115 | -0.067592 |
| C | -2.617146 | -0.034888 | 0.234240  |
| H | -0.361007 | -1.830842 | -1.333412 |
| H | 0.610936  | -0.932251 | 1.455759  |
| H | 2.914240  | -0.902964 | 0.421811  |
| H | 0.976154  | 1.082106  | -0.920658 |
| H | 2.424260  | 2.746591  | 0.081808  |
| H | 1.057992  | -2.441203 | 0.660994  |
| H | 2.178297  | -1.162204 | -1.155687 |
| N | -2.939200 | 1.283097  | -0.137016 |
| H | -3.405404 | -0.556005 | 0.766553  |
| H | 3.471364  | 1.414049  | 0.819928  |
| H | -3.469217 | 1.767860  | 0.573003  |
| H | -2.131055 | 1.829751  | -0.399797 |

### 1 NO2

SCF Energy: -477.169194872

Num. Imaginary Frequencies: 0

|   |           |           |           |
|---|-----------|-----------|-----------|
| C | -3.806134 | 1.450154  | -0.401657 |
| C | -2.986804 | 0.649127  | 0.264473  |
| C | -2.841195 | -0.818952 | 0.005004  |
| C | -1.423524 | -1.201247 | -0.447411 |
| C | -0.405534 | -0.944515 | 0.630054  |
| C | 0.600064  | -0.137704 | 0.513947  |
| C | 1.598416  | 0.691071  | 0.393057  |
| H | -0.528706 | -1.466679 | 1.575989  |
| H | -1.155705 | -0.652470 | -1.349090 |
| H | -3.548089 | -1.129059 | -0.765049 |
| H | -2.360516 | 1.064464  | 1.049196  |
| H | -3.869278 | 2.507182  | -0.179940 |
| H | -1.400357 | -2.266910 | -0.681525 |
| H | -3.079830 | -1.379968 | 0.912941  |
| H | 1.602661  | 1.741161  | 0.634713  |
| N | 2.882746  | 0.218919  | -0.114406 |
| H | -4.444081 | 1.070558  | -1.191655 |
| O | 3.764012  | 1.050911  | -0.193074 |
| O | 3.010105  | -0.944450 | -0.425619 |

### 1 OH

SCF Energy: -347.878602144

Num. Imaginary Frequencies: 0

|   |           |           |           |
|---|-----------|-----------|-----------|
| C | -2.659486 | 1.664641  | -0.202497 |
| C | -1.860510 | 0.753540  | 0.335500  |
| C | -2.015446 | -0.725127 | 0.155796  |
| C | -0.783557 | -1.370589 | -0.499540 |
| C | 0.433906  | -1.287358 | 0.381703  |
| C | 1.522432  | -0.629585 | 0.095850  |
| C | 2.621247  | -0.000326 | -0.219017 |
| H | 0.366686  | -1.807153 | 1.336225  |
| H | -0.579699 | -0.891630 | -1.457194 |
| H | -2.896901 | -0.929865 | -0.453314 |
| H | -1.018347 | 1.077769  | 0.940503  |
| H | -2.497089 | 2.723203  | -0.048076 |
| H | -1.004622 | -2.422805 | -0.691915 |
| H | -2.176269 | -1.197717 | 1.129602  |
| O | 2.830056  | 1.319730  | 0.093091  |
| H | 3.424834  | -0.502855 | -0.744472 |
| H | -3.506539 | 1.378114  | -0.815572 |
| H | 3.695986  | 1.583917  | -0.227279 |

### 1 OMe

SCF Energy: -387.169948668

Num. Imaginary Frequencies: 0

## 2 *CARTESIAN COORDINATES*

|   |           |           |           |
|---|-----------|-----------|-----------|
| C | 3.463652  | 1.638940  | 0.225396  |
| C | 2.673433  | 0.732993  | -0.333696 |
| C | 2.691836  | -0.728687 | -0.008081 |
| C | 1.346050  | -1.227547 | 0.541279  |
| C | 0.245924  | -1.130630 | -0.481861 |
| C | -0.841356 | -0.424521 | -0.349624 |
| C | -1.901231 | 0.323401  | -0.199999 |
| H | 0.398660  | -1.694651 | -1.400687 |
| H | 1.073597  | -0.659887 | 1.430990  |
| H | 3.476660  | -0.932170 | 0.721618  |
| H | 1.943279  | 1.050245  | -1.073109 |
| H | 3.403090  | 2.685957  | -0.040802 |
| H | 1.458154  | -2.273848 | 0.834578  |
| H | 2.930003  | -1.300941 | -0.909899 |
| H | -1.913141 | 1.357968  | -0.531871 |
| O | -3.044072 | -0.121291 | 0.404112  |
| H | 4.201027  | 1.359152  | 0.969327  |
| C | -4.197727 | 0.634926  | 0.070350  |
| H | -5.017357 | 0.237045  | 0.661172  |
| H | -4.052490 | 1.689468  | 0.314463  |
| H | -4.432396 | 0.538738  | -0.991262 |

### **1 tBut**

SCF Energy: -429.890408811

Num. Imaginary Frequencies: 0

|   |           |           |           |
|---|-----------|-----------|-----------|
| C | 4.233088  | 1.542048  | 0.177917  |
| C | 3.413369  | 0.649753  | -0.360645 |
| C | 3.314987  | -0.782217 | 0.066063  |
| C | 1.906836  | -1.156245 | 0.554895  |
| C | 0.879121  | -1.078617 | -0.543789 |
| C | -0.148940 | -0.276657 | -0.542571 |
| C | -1.178490 | 0.522249  | -0.520243 |
| H | 1.028600  | -1.734991 | -1.398047 |
| H | 1.615185  | -0.501500 | 1.376784  |
| H | 4.038217  | -0.978829 | 0.858914  |
| H | 2.744508  | 0.957878  | -1.159430 |
| H | 4.256945  | 2.568697  | -0.163064 |
| H | 1.934505  | -2.177703 | 0.940986  |
| H | 3.571037  | -1.432483 | -0.776150 |
| H | -1.073739 | 1.517624  | -0.948134 |
| C | -2.544444 | 0.197230  | 0.055669  |
| H | 4.910878  | 1.271110  | 0.979578  |
| C | -2.860913 | 1.224578  | 1.148208  |
| C | -3.581983 | 0.318394  | -1.065728 |
| C | -2.580392 | -1.208917 | 0.643415  |
| H | -3.570309 | -1.416834 | 1.052163  |
| H | -2.358922 | -1.956834 | -0.119279 |
| H | -1.847506 | -1.315503 | 1.444835  |
| H | -4.584479 | 0.141378  | -0.671675 |
| H | -3.561337 | 1.315623  | -1.508669 |
| H | -3.387332 | -0.410514 | -1.853510 |
| H | -3.860112 | 1.049496  | 1.551331  |
| H | -2.141823 | 1.154080  | 1.965395  |
| H | -2.827742 | 2.239710  | 0.748829  |

### **3 CH3 Z**

SCF Energy: -311.981423614

Num. Imaginary Frequencies: 0

## 2 CARTESIAN COORDINATES

|   |           |           |           |
|---|-----------|-----------|-----------|
| C | -2.991537 | -0.505790 | -0.354550 |
| C | -1.731688 | -0.915182 | -0.374691 |
| C | -0.737170 | -0.711893 | 0.735711  |
| C | 0.554512  | -0.082412 | 0.258784  |
| C | 0.541397  | 1.347033  | -0.071678 |
| C | -0.502935 | 2.163054  | 0.065485  |
| C | 1.653771  | -0.839538 | 0.138813  |
| H | 1.562182  | -1.885251 | 0.419230  |
| H | 1.464326  | 1.767469  | -0.451051 |
| H | -1.462609 | 1.820728  | 0.428165  |
| H | -3.392245 | 0.040279  | 0.492382  |
| H | -1.358482 | -1.455909 | -1.240347 |
| H | -0.499322 | -1.685570 | 1.169430  |
| H | -0.421908 | 3.210444  | -0.191829 |
| H | -3.663777 | -0.700522 | -1.179589 |
| C | 3.015591  | -0.441884 | -0.332908 |
| H | -1.191797 | -0.110157 | 1.525977  |
| H | 3.307265  | -1.051789 | -1.190263 |
| H | 3.090859  | 0.602562  | -0.620547 |
| H | 3.753864  | -0.632616 | 0.448651  |

### 3 CH3 E

SCF Energy: -311.982557021

Num. Imaginary Frequencies: 0

|   |           |           |           |
|---|-----------|-----------|-----------|
| C | -2.371469 | -1.522085 | -0.277114 |
| C | -1.053973 | -1.383038 | -0.256116 |
| C | -0.285425 | -0.594375 | 0.768175  |
| C | 0.544888  | 0.495102  | 0.128474  |
| C | 1.831526  | 0.336791  | -0.208155 |
| C | -0.106644 | 1.774426  | -0.179164 |
| C | -1.383282 | 2.085179  | 0.037662  |
| H | 0.538836  | 2.518971  | -0.635993 |
| H | -2.084128 | 1.387039  | 0.475698  |
| H | -2.998638 | -1.055035 | 0.474000  |
| H | -0.452290 | -1.858956 | -1.025882 |
| H | 0.366202  | -1.270632 | 1.321817  |
| H | -1.767310 | 3.059866  | -0.230550 |
| H | -2.867055 | -2.106324 | -1.041034 |
| C | 2.681936  | -0.879171 | -0.037491 |
| H | 2.326680  | 1.184424  | -0.674048 |
| H | -0.977288 | -0.162908 | 1.492651  |
| H | 3.080444  | -1.194915 | -1.003841 |
| H | 3.543842  | -0.658148 | 0.595781  |
| H | 2.145362  | -1.720360 | 0.393768  |

### 3 CHO E

SCF Energy: -386.004581598

Num. Imaginary Frequencies: 0

|   |           |           |           |
|---|-----------|-----------|-----------|
| C | -2.508118 | -1.782684 | -0.318476 |
| C | -1.224119 | -1.462613 | -0.276004 |
| C | -0.593357 | -0.593035 | 0.779972  |
| C | 0.103552  | 0.598545  | 0.166897  |
| C | 1.418570  | 0.627001  | -0.124957 |
| C | -0.699534 | 1.776019  | -0.177259 |
| C | -2.012726 | 1.896455  | 0.002202  |
| H | -0.150196 | 2.598110  | -0.622943 |
| H | -2.617165 | 1.108135  | 0.429447  |
| H | -3.206734 | -1.416354 | 0.424984  |
| H | -0.547518 | -1.842089 | -1.036210 |
| H | 0.115537  | -1.186362 | 1.354991  |
| H | -2.526323 | 2.802458  | -0.288258 |
| H | -2.902983 | -2.424438 | -1.094489 |
| C | 2.362347  | -0.461766 | 0.104702  |
| H | 1.846218  | 1.510861  | -0.585268 |
| H | -1.355205 | -0.252878 | 1.480786  |
| O | 3.535850  | -0.387545 | -0.196150 |
| H | 1.977868  | -1.384611 | 0.563698  |

### 3 CHO Z

SCF Energy: -386.003460098

Num. Imaginary Frequencies: 0

|   |           |           |           |
|---|-----------|-----------|-----------|
| C | -3.238474 | -0.838682 | -0.431237 |
| C | -1.937851 | -1.079849 | -0.372584 |
| C | -1.044745 | -0.691846 | 0.776665  |
| C | 0.168346  | 0.081061  | 0.314024  |
| C | 1.353899  | -0.556795 | 0.245340  |
| C | -0.006049 | 1.485683  | -0.069099 |
| C | -1.155070 | 2.152489  | 0.017191  |
| H | 0.859981  | 2.013676  | -0.443306 |
| H | -2.068733 | 1.696517  | 0.372001  |
| H | -3.751514 | -0.310447 | 0.364447  |
| H | -1.450129 | -1.610071 | -1.185211 |
| H | -0.699994 | -1.599198 | 1.274928  |
| H | -1.209357 | 3.191409  | -0.277493 |
| H | -3.834175 | -1.163244 | -1.273730 |
| H | 1.419938  | -1.595872 | 0.547842  |
| C | 2.617493  | 0.017417  | -0.209602 |
| H | -1.612311 | -0.113895 | 1.507065  |
| O | 3.646846  | -0.624451 | -0.248184 |
| H | 2.626238  | 1.069868  | -0.525266 |

### 3 CN E

SCF Energy: -364.930169305

Num. Imaginary Frequencies: 0

## 2 CARTESIAN COORDINATES

|   |           |           |           |
|---|-----------|-----------|-----------|
| C | -2.113301 | -2.033366 | -0.230363 |
| C | -0.904242 | -1.503030 | -0.327531 |
| C | -0.283772 | -0.597250 | 0.704148  |
| C | 0.156505  | 0.708299  | 0.095223  |
| C | 1.433411  | 0.935345  | -0.258047 |
| C | -0.829070 | 1.758550  | -0.165756 |
| C | -2.126783 | 1.670090  | 0.112881  |
| H | -0.442402 | 2.662342  | -0.623498 |
| H | -2.564542 | 0.787728  | 0.559414  |
| H | -2.753037 | -1.828819 | 0.620523  |
| H | -0.283730 | -1.723612 | -1.191049 |
| H | 0.584157  | -1.096336 | 1.138574  |
| H | -2.795100 | 2.490242  | -0.109517 |
| H | -2.501940 | -2.692432 | -0.994862 |
| C | 2.469333  | -0.025072 | -0.062558 |
| H | 1.732941  | 1.866325  | -0.720319 |
| H | -0.992115 | -0.414189 | 1.512113  |
| N | 3.314754  | -0.790379 | 0.085805  |

### 3 CN Z

SCF Energy: -364.929623207

Num. Imaginary Frequencies: 0

|   |           |           |           |
|---|-----------|-----------|-----------|
| C | -3.238994 | -0.410477 | -0.480750 |
| C | -1.999990 | -0.874405 | -0.432658 |
| C | -1.072160 | -0.711747 | 0.742819  |
| C | 0.255884  | -0.123919 | 0.337783  |
| C | 1.330541  | -0.927927 | 0.261402  |
| C | 0.349337  | 1.299131  | 0.010936  |
| C | -0.660370 | 2.160855  | 0.100442  |
| H | 1.319547  | 1.654035  | -0.318056 |
| H | -1.650649 | 1.862061  | 0.415867  |
| H | -3.664023 | 0.150674  | 0.343699  |
| H | -1.598419 | -1.432412 | -1.273153 |
| H | -0.892030 | -1.690708 | 1.190078  |
| H | -0.517981 | 3.203264  | -0.148626 |
| H | -3.870108 | -0.578306 | -1.342972 |
| H | 1.266823  | -1.978569 | 0.509097  |
| C | 2.619085  | -0.465233 | -0.142881 |
| H | -1.543966 | -0.086736 | 1.502353  |
| N | 3.664401  | -0.111566 | -0.465835 |

### 3 H

SCF Energy: -272.671808511

Num. Imaginary Frequencies: 0

|   |           |           |           |
|---|-----------|-----------|-----------|
| C | 0.382709  | -0.747722 | -0.671011 |
| C | 1.484017  | -0.628470 | 0.347482  |
| C | 2.593185  | 0.077825  | 0.188007  |
| C | -0.528943 | 2.038926  | -0.090675 |
| C | -1.306496 | 0.992382  | 0.174673  |
| C | -0.973461 | -0.412089 | -0.095900 |
| C | -1.861025 | -1.367662 | 0.185222  |
| H | -2.281694 | 1.158859  | 0.621841  |
| H | 0.454272  | 1.928494  | -0.528377 |
| H | 2.771855  | 0.649527  | -0.715880 |
| H | 1.331801  | -1.188015 | 1.266280  |
| H | 0.351514  | -1.777138 | -1.034071 |
| H | -0.858204 | 3.044974  | 0.130666  |
| H | 3.358659  | 0.108983  | 0.951862  |
| H | -1.649994 | -2.410949 | -0.011010 |
| H | -2.823709 | -1.126954 | 0.618691  |
| H | 0.605590  | -0.106921 | -1.526792 |

### 3 NH2 E

SCF Energy: -328.039438731

Num. Imaginary Frequencies: 0

|   |           |           |           |
|---|-----------|-----------|-----------|
| C | -2.404878 | -1.438812 | -0.297973 |
| C | -1.082427 | -1.365886 | -0.250664 |
| C | -0.300839 | -0.590729 | 0.774431  |
| C | 0.566378  | 0.465681  | 0.136368  |
| C | 1.846555  | 0.222777  | -0.210469 |
| C | 0.002342  | 1.770364  | -0.173429 |
| C | -1.253926 | 2.171986  | 0.040514  |
| H | 0.694311  | 2.473714  | -0.629944 |
| H | -2.002537 | 1.522312  | 0.474821  |
| H | -3.021484 | -0.933925 | 0.437320  |
| H | -0.489978 | -1.876626 | -1.005107 |
| H | 0.319258  | -1.282524 | 1.351689  |
| H | -1.566747 | 3.171992  | -0.225716 |
| H | -2.914898 | -2.002581 | -1.067860 |
| N | 2.520690  | -0.966602 | -0.097242 |
| H | 2.423930  | 1.011757  | -0.678737 |
| H | -0.988916 | -0.132528 | 1.487084  |
| H | 3.525349  | -0.919691 | -0.079613 |
| H | 2.137650  | -1.677978 | 0.504095  |

### 3 NH2 Z

SCF Energy: -328.036952597

Num. Imaginary Frequencies: 0

## 2 CARTESIAN COORDINATES

|   |           |           |           |
|---|-----------|-----------|-----------|
| C | -2.983978 | -0.475462 | -0.336076 |
| C | -1.731685 | -0.906333 | -0.380764 |
| C | -0.714976 | -0.734367 | 0.715418  |
| C | 0.566646  | -0.088481 | 0.244713  |
| C | 1.676756  | -0.843249 | 0.117264  |
| C | 0.573755  | 1.336212  | -0.057783 |
| C | -0.458741 | 2.173794  | 0.071393  |
| H | 1.511863  | 1.759373  | -0.403530 |
| H | -1.431919 | 1.839430  | 0.404954  |
| H | -3.362084 | 0.063139  | 0.526072  |
| H | -1.379909 | -1.436816 | -1.261845 |
| H | -0.474540 | -1.721284 | 1.118906  |
| H | -0.351155 | 3.224263  | -0.161297 |
| H | -3.671877 | -0.642975 | -1.154268 |
| H | 1.626484  | -1.892786 | 0.384196  |
| N | 2.937578  | -0.436745 | -0.262051 |
| H | -1.160841 | -0.157781 | 1.530981  |
| H | 3.546044  | -1.163541 | -0.599405 |
| H | 3.018225  | 0.413518  | -0.795393 |

### 3 NO2 E

SCF Energy: -477.190513027

Num. Imaginary Frequencies: 0

|   |           |           |           |
|---|-----------|-----------|-----------|
| C | -2.506306 | -1.924702 | -0.365625 |
| C | -1.254420 | -1.508372 | -0.252916 |
| C | -0.781244 | -0.528873 | 0.789220  |
| C | -0.194883 | 0.700023  | 0.145816  |
| C | 1.085836  | 0.862372  | -0.215341 |
| C | -1.074601 | 1.837648  | -0.150250 |
| C | -2.390973 | 1.856193  | 0.039153  |
| H | -0.591906 | 2.708043  | -0.579431 |
| H | -2.937425 | 1.017817  | 0.447739  |
| H | -3.283737 | -1.571726 | 0.302078  |
| H | -0.491676 | -1.875374 | -0.930840 |
| H | -0.031548 | -1.004501 | 1.417159  |
| H | -2.967569 | 2.730513  | -0.228625 |
| H | -2.794295 | -2.638687 | -1.125486 |
| N | 2.131412  | -0.115883 | -0.041993 |
| H | 1.476857  | 1.773145  | -0.637978 |
| H | -1.613458 | -0.235375 | 1.425543  |
| O | 3.272751  | 0.300444  | -0.125804 |
| O | 1.854052  | -1.282745 | 0.158734  |

### 3 NO2 Z

SCF Energy: -477.188399184

Num. Imaginary Frequencies: 0

|   |           |           |           |
|---|-----------|-----------|-----------|
| C | -3.563200 | -0.717018 | -0.434640 |
| C | -2.274788 | -1.018545 | -0.401263 |
| C | -1.359720 | -0.719184 | 0.755979  |
| C | -0.111064 | 0.020070  | 0.323864  |
| C | 1.017771  | -0.702423 | 0.320137  |
| C | -0.235852 | 1.414510  | -0.105811 |
| C | -1.345304 | 2.132731  | 0.057065  |
| H | 0.620967  | 1.866795  | -0.578253 |
| H | -2.236007 | 1.743412  | 0.529741  |
| H | -4.043633 | -0.198340 | 0.387125  |
| H | -1.818135 | -1.537743 | -1.238421 |
| H | -1.062715 | -1.657499 | 1.225845  |
| H | -1.384619 | 3.157415  | -0.285956 |
| H | -4.181048 | -0.980896 | -1.282225 |
| H | 1.053078  | -1.747297 | 0.579765  |
| N | 2.331949  | -0.239141 | -0.068476 |
| H | -1.889950 | -0.136905 | 1.510237  |
| O | 3.152916  | -1.110340 | -0.292075 |
| O | 2.578504  | 0.948365  | -0.140490 |

### 3 OH E

SCF Energy: -347.909419332

Num. Imaginary Frequencies: 0

|   |           |           |           |
|---|-----------|-----------|-----------|
| C | -2.499942 | -1.311618 | -0.247247 |
| C | -1.175921 | -1.284356 | -0.291383 |
| C | -0.292248 | -0.628385 | 0.733752  |
| C | 0.602774  | 0.417570  | 0.118526  |
| C | 1.872238  | 0.143543  | -0.200509 |
| C | 0.089098  | 1.750914  | -0.175736 |
| C | -1.151501 | 2.180294  | 0.056225  |
| H | 0.801841  | 2.437084  | -0.624716 |
| H | -1.909885 | 1.541157  | 0.489026  |
| H | -3.045081 | -0.841603 | 0.563723  |
| H | -0.656795 | -1.759264 | -1.119389 |
| H | 0.333563  | -1.389982 | 1.201981  |
| H | -1.442260 | 3.191667  | -0.191379 |
| H | -3.082472 | -1.803355 | -1.014983 |
| O | 2.421823  | -1.077257 | 0.013514  |
| H | 2.519350  | 0.887593  | -0.650694 |
| H | -0.907711 | -0.182537 | 1.517362  |
| H | 3.347878  | -1.070486 | -0.240813 |

### 3 OH Z

SCF Energy: -347.908052970

Num. Imaginary Frequencies: 0



## 2 CARTESIAN COORDINATES

C -2.983256 -0.444719 -0.313217  
C -1.734427 -0.881375 -0.382250  
C -0.708551 -0.741549 0.709670  
C 0.573577 -0.101348 0.237901  
C 1.668923 -0.856865 0.099646  
C 0.612460 1.325558 -0.071445  
C -0.404234 2.175577 0.074971  
H 1.560328 1.702022 -0.439169  
H -1.375175 1.855592 0.429400  
H -3.348711 0.076129 0.564987  
H -1.394398 -1.393997 -1.278101  
H -0.475090 -1.737206 1.095290  
H -0.288279 3.223859 -0.164069  
H -3.680706 -0.590260 -1.127385  
H 1.661733 -1.914360 0.337246  
O 2.851867 -0.356424 -0.341449  
H -1.136339 -0.171253 1.538181  
H 3.514760 -1.050800 -0.356448

### 3 OMe E

SCF Energy: -387.200987633

Num. Imaginary Frequencies: 0

C -2.673221 -1.734029 -0.286061  
C -1.379160 -1.449228 -0.283101  
C -0.681003 -0.620379 0.759799  
C 0.013691 0.573183 0.155228  
C 1.323335 0.547140 -0.122327  
C -0.737739 1.777753 -0.178015  
C -2.045922 1.959531 0.005023  
H -0.155841 2.584972 -0.614043  
H -2.680784 1.188843 0.421997  
H -3.330606 -1.370450 0.495882  
H -0.745462 -1.823141 -1.082645  
H 0.065307 -1.237611 1.262686  
H -2.518593 2.892551 -0.268414  
H -3.118444 -2.339076 -1.064691  
O 2.093130 -0.533729 0.116565  
H 1.828636 1.400781 -0.565371  
H -1.401387 -0.295091 1.512720  
C 3.480959 -0.350487 -0.128560  
H 3.965275 -1.298897 0.081318  
H 3.652905 -0.074950 -1.169974  
H 3.888308 0.420994 0.526100

### 3 OMe Z

SCF Energy: -387.199526820

Num. Imaginary Frequencies: 0

C -3.354832 -0.866045 -0.364248  
C -2.048201 -1.084311 -0.381324  
C -1.100105 -0.741647 0.735991  
C 0.072004 0.092637 0.281784  
C 1.282904 -0.473956 0.197797  
C -0.117161 1.496933 -0.070367  
C -1.266175 2.167650 0.018567  
H 0.767379 2.017491 -0.419528  
H -2.182269 1.698238 0.351980  
H -3.834498 -0.392366 0.485245  
H -1.594398 -1.555220 -1.249232  
H -0.716248 -1.671974 1.162181  
H -1.318269 3.214258 -0.248607  
H -3.988129 -1.150853 -1.193878  
H 1.442551 -1.513376 0.470391  
O 2.378165 0.191296 -0.228580  
H -1.647205 -0.228675 1.531117  
C 3.587790 -0.551340 -0.176977  
H 4.371064 0.095645 -0.559365  
H 3.820042 -0.837948 0.849684  
H 3.517323 -1.445118 -0.798690

### 3 tBut E

SCF Energy: -429.904706786

Num. Imaginary Frequencies: 0

## 2 *CARTESIAN COORDINATES*

---

|   |           |           |           |
|---|-----------|-----------|-----------|
| C | -3.080495 | -1.810169 | -0.199920 |
| C | -1.828555 | -1.387755 | -0.297679 |
| C | -1.130865 | -0.519871 | 0.715323  |
| C | -0.528936 | 0.718223  | 0.091226  |
| C | 0.766904  | 0.873606  | -0.215768 |
| C | -1.441758 | 1.829148  | -0.219057 |
| C | -2.752934 | 1.863911  | 0.010282  |
| H | -0.972791 | 2.693518  | -0.679661 |
| H | -3.287016 | 1.034482  | 0.453907  |
| H | -3.704394 | -1.534606 | 0.642997  |
| H | -1.232456 | -1.675906 | -1.159041 |
| H | -0.352417 | -1.101602 | 1.204608  |
| H | -3.335195 | 2.736548  | -0.252465 |
| H | -3.523541 | -2.444604 | -0.956000 |
| C | 1.949768  | -0.059994 | -0.028366 |
| H | 1.028025  | 1.830771  | -0.662131 |
| H | -1.840219 | -0.232371 | 1.493762  |
| C | 3.150713  | 0.563659  | -0.750177 |
| C | 2.301818  | -0.188793 | 1.461126  |
| C | 1.707957  | -1.448445 | -0.635994 |
| H | 3.186435  | -0.818081 | 1.578925  |
| H | 2.520914  | 0.790642  | 1.888386  |
| H | 1.491175  | -0.634023 | 2.036495  |
| H | 4.035390  | -0.062456 | -0.627542 |
| H | 2.949433  | 0.666899  | -1.817960 |
| H | 3.373209  | 1.553494  | -0.348102 |
| H | 2.630571  | -2.030321 | -0.589582 |
| H | 0.938782  | -2.009800 | -0.109639 |
| H | 1.412383  | -1.363701 | -1.682928 |

### **3 tBut Z**

SCF Energy: -429.902922477  
Num. Imaginary Frequencies: 0

|   |           |           |           |
|---|-----------|-----------|-----------|
| C | 3.949469  | -0.801067 | 0.399386  |
| C | 2.654713  | -1.071065 | 0.321995  |
| C | 1.757658  | -0.694748 | -0.825630 |
| C | 0.505019  | 0.031154  | -0.375768 |
| C | -0.660673 | -0.632045 | -0.365690 |
| C | 0.650900  | 1.429989  | 0.047064  |
| C | 1.780658  | 2.135346  | 0.006585  |
| H | -0.236170 | 1.925988  | 0.414394  |
| H | 2.716377  | 1.716351  | -0.337254 |
| H | 4.458008  | -0.251702 | -0.385214 |
| H | 2.173303  | -1.619847 | 1.127140  |
| H | 1.453411  | -1.608582 | -1.339861 |
| H | 1.796110  | 3.167791  | 0.328533  |
| H | 4.544567  | -1.118518 | 1.245297  |
| H | -0.616844 | -1.660542 | -0.716420 |
| C | -2.052273 | -0.188874 | 0.057910  |
| H | 2.317680  | -0.093563 | -1.545197 |
| C | -2.998628 | -1.377354 | -0.153540 |
| C | -2.096849 | 0.186295  | 1.546102  |
| C | -2.562661 | 0.974788  | -0.804014 |
| H | -4.015335 | -1.110835 | 0.138249  |
| H | -3.011397 | -1.680174 | -1.202025 |
| H | -2.683920 | -2.234096 | 0.444905  |
| H | -3.591070 | 1.214299  | -0.526010 |
| H | -1.964062 | 1.875730  | -0.685450 |
| H | -2.551535 | 0.700012  | -1.859737 |
| H | -3.122515 | 0.424962  | 1.834750  |
| H | -1.756991 | -0.649482 | 2.159474  |
| H | -1.473606 | 1.047691  | 1.778021  |

### **4 BH2**

SCF Energy: -411.413851683  
Num. Imaginary Frequencies: 0

|   |           |           |           |
|---|-----------|-----------|-----------|
| C | 0.147468  | 1.058009  | -0.808290 |
| C | 1.328773  | 1.292280  | 0.135171  |
| C | 2.196039  | 0.058001  | 0.182084  |
| C | 1.471516  | -1.205225 | -0.205533 |
| O | 0.108025  | -1.173238 | 0.218996  |
| C | -0.626250 | -0.141844 | -0.321105 |
| C | 3.481674  | 0.058748  | 0.502653  |
| C | -1.930969 | -0.210269 | -0.339327 |
| C | -3.246968 | -0.204016 | -0.291929 |
| H | 1.912517  | -2.080302 | 0.264416  |
| H | 4.005336  | 0.980727  | 0.721966  |
| H | 1.505810  | -1.345065 | -1.290777 |
| B | -3.969558 | 0.311161  | 0.966660  |
| H | -3.793164 | -0.576426 | -1.155881 |
| H | 4.050896  | -0.861292 | 0.550942  |
| H | -0.512202 | 1.920808  | -0.853034 |
| H | 0.516389  | 0.873891  | -1.820387 |
| H | 0.942162  | 1.499829  | 1.136348  |
| H | 1.910071  | 2.159418  | -0.174559 |
| H | -5.157482 | 0.308001  | 1.033616  |
| H | -3.324443 | 0.716405  | 1.879749  |

**4 CH3**

SCF Energy: -425.291646775

Num. Imaginary Frequencies: 0

|   |           |           |           |
|---|-----------|-----------|-----------|
| C | -0.278144 | 1.189066  | 0.509420  |
| C | -1.633486 | 1.258738  | -0.196823 |
| C | -2.374342 | -0.041449 | -0.002851 |
| C | -1.472078 | -1.204646 | 0.319584  |
| O | -0.222567 | -1.099445 | -0.359559 |
| C | 0.509560  | 0.028965  | -0.045752 |
| C | -3.691210 | -0.171785 | -0.074657 |
| C | 1.793195  | 0.059130  | -0.294567 |
| C | 3.068379  | 0.137309  | -0.555902 |
| H | -1.910083 | -2.148680 | 0.005613  |
| H | -4.331845 | 0.683558  | -0.249385 |
| H | -1.292620 | -1.254359 | 1.398844  |
| H | 3.380916  | 0.465609  | -1.545202 |
| C | 4.170418  | -0.196999 | 0.410179  |
| H | -4.169487 | -1.136232 | 0.044011  |
| H | 0.293328  | 2.104307  | 0.378807  |
| H | -0.434573 | 1.052172  | 1.582772  |
| H | -1.464696 | 1.420953  | -1.264718 |
| H | -2.225568 | 2.096718  | 0.168381  |
| H | 4.812844  | 0.670779  | 0.567544  |
| H | 3.769376  | -0.516144 | 1.369383  |
| H | 4.799198  | -0.993100 | 0.008636  |

**4 CHO**

SCF Energy: -499.314342879

Num. Imaginary Frequencies: 0

|   |           |           |           |
|---|-----------|-----------|-----------|
| C | -0.675825 | 0.920719  | 1.013329  |
| C | -1.761902 | 1.318629  | 0.011814  |
| C | -2.651735 | 0.133842  | -0.280534 |
| C | -2.041482 | -1.191904 | 0.088503  |
| O | -0.635517 | -1.216755 | -0.180722 |
| C | 0.090356  | -0.248015 | 0.451783  |
| C | -3.872047 | 0.223549  | -0.788468 |
| C | 1.394469  | -0.336298 | 0.505621  |
| C | 2.704304  | -0.342973 | 0.517100  |
| H | -2.467754 | -2.005963 | -0.490795 |
| H | -4.325085 | 1.185103  | -0.994759 |
| H | -2.202669 | -1.403530 | 1.149741  |
| C | 3.457453  | 0.247636  | -0.604196 |
| H | 3.283985  | -0.772612 | 1.328210  |
| H | -4.457432 | -0.660526 | -1.007928 |
| H | 0.009126  | 1.739260  | 1.216571  |
| H | -1.133511 | 0.629697  | 1.961885  |
| H | -1.282583 | 1.648714  | -0.913066 |
| H | -2.347090 | 2.155683  | 0.389469  |
| O | 4.663514  | 0.273844  | -0.659236 |
| H | 2.837498  | 0.676347  | -1.409378 |

**4 CN**

SCF Energy: -478.233433559

Num. Imaginary Frequencies: 0

## 2 CARTESIAN COORDINATES

|   |           |           |           |
|---|-----------|-----------|-----------|
| C | -0.510077 | 1.142323  | 0.598012  |
| C | -1.890413 | 1.271988  | -0.049595 |
| C | -2.626258 | -0.044841 | 0.031418  |
| C | -1.738286 | -1.222809 | 0.328452  |
| O | -0.478514 | -1.114945 | -0.346132 |
| C | 0.229957  | 0.015087  | -0.071318 |
| C | -3.935959 | -0.178190 | -0.116529 |
| C | 1.482775  | 0.107361  | -0.434527 |
| C | 2.721082  | 0.269293  | -0.822212 |
| H | -2.176922 | -2.155029 | -0.015247 |
| H | -4.573823 | 0.682757  | -0.272230 |
| H | -1.556328 | -1.303036 | 1.404043  |
| H | 2.983994  | 0.649712  | -1.803395 |
| C | 3.822849  | -0.058348 | 0.039725  |
| H | -4.410877 | -1.150510 | -0.080325 |
| H | 0.067535  | 2.058351  | 0.511128  |
| H | -0.615849 | 0.917755  | 1.661974  |
| H | -1.762154 | 1.551795  | -1.097853 |
| H | -2.464727 | 2.064242  | 0.428105  |
| N | 4.714749  | -0.315379 | 0.716043  |

### 4 F

SCF Energy: -485.230981998

Num. Imaginary Frequencies: 0

|   |           |           |           |
|---|-----------|-----------|-----------|
| C | -0.231453 | 1.148653  | 0.617853  |
| C | -1.550476 | 1.286401  | -0.146052 |
| C | -2.331893 | -0.003968 | -0.067195 |
| C | -1.517180 | -1.180070 | 0.397404  |
| O | -0.196414 | -1.159412 | -0.156817 |
| C | 0.527366  | -0.031142 | 0.075983  |
| C | -3.621368 | -0.115613 | -0.350145 |
| C | 1.807088  | -0.004297 | -0.214212 |
| C | 3.044114  | 0.108347  | -0.574958 |
| H | -1.954833 | -2.122986 | 0.082609  |
| H | -4.211818 | 0.748262  | -0.628645 |
| H | -1.440770 | -1.183030 | 1.488691  |
| H | 3.410777  | 0.407117  | -1.547807 |
| F | 4.072743  | -0.156558 | 0.274131  |
| H | -4.127383 | -1.071765 | -0.305695 |
| H | 0.383045  | 2.040014  | 0.531735  |
| H | -0.433409 | 0.987716  | 1.679878  |
| H | -1.329496 | 1.512973  | -1.191695 |
| H | -2.136684 | 2.116148  | 0.246214  |

### 4 H

SCF Energy: -385.979987528

Num. Imaginary Frequencies: 0

|   |           |           |           |
|---|-----------|-----------|-----------|
| C | -1.043011 | 1.267517  | -0.250398 |
| C | -1.848698 | 0.002968  | -0.077419 |
| C | -1.026694 | -1.179842 | 0.364283  |
| O | 0.276554  | -1.155509 | -0.216785 |
| C | 1.024778  | -0.041874 | 0.099474  |
| C | 0.252799  | 1.169189  | 0.556749  |
| C | -3.158092 | -0.081815 | -0.262855 |
| C | 2.322204  | -0.065254 | -0.062947 |
| C | 3.611684  | -0.039924 | -0.242444 |
| H | -1.478461 | -2.118597 | 0.054548  |
| H | -3.746185 | 0.789148  | -0.523727 |
| H | -0.933671 | -1.189279 | 1.455298  |
| H | 4.046896  | 0.229617  | -1.199086 |
| H | 4.301384  | -0.291194 | 0.556294  |
| H | -3.682782 | -1.022967 | -0.154343 |
| H | 0.871161  | 2.055081  | 0.438366  |
| H | 0.014592  | 1.076518  | 1.619626  |
| H | -0.789774 | 1.391639  | -1.306548 |
| H | -1.625415 | 2.138310  | 0.047191  |

### 4 NH2

SCF Energy: -441.343168351

Num. Imaginary Frequencies: 0

|   |           |           |           |
|---|-----------|-----------|-----------|
| C | -0.269907 | 1.060094  | 0.799520  |
| C | -1.453391 | 1.295012  | -0.141139 |
| C | -2.317344 | 0.058750  | -0.191641 |
| C | -1.604239 | -1.189569 | 0.257599  |
| O | -0.237276 | -1.189372 | -0.148652 |
| C | 0.520360  | -0.134285 | 0.324303  |
| C | -3.589228 | 0.047010  | -0.563986 |
| C | 1.825237  | -0.198833 | 0.281856  |
| C | 3.135437  | -0.185130 | 0.276840  |
| H | -2.049816 | -2.081266 | -0.176151 |
| H | -4.105702 | 0.961009  | -0.829595 |
| H | -1.656449 | -1.279672 | 1.347788  |
| N | 3.957684  | 0.303037  | -0.740465 |
| H | 3.683871  | -0.532174 | 1.147899  |
| H | -4.154473 | -0.875637 | -0.609706 |
| H | 0.387066  | 1.924278  | 0.844071  |
| H | -0.640196 | 0.878208  | 1.812292  |
| H | -1.068155 | 1.506087  | -1.142282 |
| H | -2.037558 | 2.160560  | 0.168812  |
| H | 4.847111  | -0.167518 | -0.810720 |
| H | 3.507169  | 0.381554  | -1.640043 |

### 4 NO2

SCF Energy: -590.500455666

Num. Imaginary Frequencies: 0

|   |           |           |           |
|---|-----------|-----------|-----------|
| C | -0.973429 | 0.259274  | 1.399922  |
| C | -1.992419 | 1.135272  | 0.666258  |
| C | -2.880363 | 0.281384  | -0.209114 |
| C | -2.373337 | -1.118845 | -0.417102 |
| O | -0.948351 | -1.142382 | -0.597671 |
| C | -0.226198 | -0.555835 | 0.381687  |
| C | -4.021460 | 0.693347  | -0.740854 |
| C | 1.080900  | -0.661329 | 0.390736  |
| C | 2.373908  | -0.719276 | 0.446778  |
| H | -2.787162 | -1.570488 | -1.313445 |
| H | -4.408589 | 1.684414  | -0.540333 |
| H | -2.625129 | -1.751013 | 0.438614  |
| N | 3.199043  | 0.276341  | -0.267046 |
| H | 2.993256  | -1.435421 | 0.965114  |
| H | -4.606241 | 0.050923  | -1.386892 |
| H | -0.271206 | 0.850736  | 1.980194  |
| H | -1.484830 | -0.419375 | 2.086667  |
| H | -1.454667 | 1.855982  | 0.046457  |
| H | -2.586347 | 1.703268  | 1.380615  |
| O | 4.401058  | 0.130609  | -0.176260 |
| O | 2.661294  | 1.163353  | -0.888261 |

**4 OH**

SCF Energy: -461.213088283

Num. Imaginary Frequencies: 0

|   |           |           |           |
|---|-----------|-----------|-----------|
| C | -0.267050 | 1.071403  | 0.807031  |
| C | -1.451812 | 1.300152  | -0.133829 |
| C | -2.303669 | 0.055295  | -0.198852 |
| C | -1.602995 | -1.181750 | 0.295920  |
| O | -0.226542 | -1.197276 | -0.086044 |
| C | 0.519457  | -0.123725 | 0.334857  |
| C | -3.559215 | 0.028137  | -0.621766 |
| C | 1.825066  | -0.165273 | 0.251875  |
| C | 3.128169  | -0.166903 | 0.229889  |
| H | -2.040623 | -2.084040 | -0.122758 |
| H | -4.070985 | 0.934249  | -0.921267 |
| H | -1.671935 | -1.243189 | 1.386658  |
| O | 3.854076  | 0.225858  | -0.863409 |
| H | 3.716483  | -0.487087 | 1.084097  |
| H | -4.115546 | -0.899296 | -0.676057 |
| H | 0.389460  | 1.935794  | 0.847379  |
| H | -0.633207 | 0.888611  | 1.820924  |
| H | -1.068065 | 1.527404  | -1.131619 |
| H | -2.044596 | 2.156038  | 0.186147  |
| H | 4.791030  | 0.138849  | -0.668625 |

**4 OMe**

SCF Energy: -500.504318667

Num. Imaginary Frequencies: 0

|   |           |           |           |
|---|-----------|-----------|-----------|
| C | -0.830408 | 1.061020  | 0.843106  |
| C | -1.971045 | 1.304138  | -0.147345 |
| C | -2.828178 | 0.066178  | -0.257067 |
| C | -2.156087 | -1.179917 | 0.254482  |
| O | -0.764690 | -1.199912 | -0.068638 |
| C | -0.031353 | -0.136088 | 0.397095  |
| C | -4.066406 | 0.051666  | -0.728823 |
| C | 1.276186  | -0.186793 | 0.374974  |
| C | 2.580200  | -0.193704 | 0.411530  |
| H | -2.580519 | -2.075441 | -0.191443 |
| H | -4.559933 | 0.963910  | -1.040056 |
| H | -2.271849 | -1.251680 | 1.340604  |
| O | 3.357110  | 0.209552  | -0.634356 |
| H | 3.130288  | -0.526125 | 1.289064  |
| H | -4.626525 | -0.871281 | -0.812766 |
| H | -0.170911 | 1.920780  | 0.918521  |
| H | -1.241786 | 0.873682  | 1.838667  |
| H | -1.542191 | 1.534125  | -1.125969 |
| H | -2.570954 | 2.162684  | 0.151475  |
| C | 4.753077  | 0.063047  | -0.417365 |
| H | 5.249502  | 0.431707  | -1.309775 |
| H | 5.075459  | 0.648479  | 0.445430  |
| H | 5.014137  | -0.985250 | -0.263311 |

**4 tBut**

SCF Energy: -543.220731036

Num. Imaginary Frequencies: 0

## 2 CARTESIAN COORDINATES

|   |           |           |           |
|---|-----------|-----------|-----------|
| C | 1.423377  | 1.025428  | -0.951905 |
| C | 2.450676  | 1.285499  | 0.151661  |
| C | 3.356988  | 0.087267  | 0.293839  |
| C | 2.756236  | -1.187827 | -0.239335 |
| O | 1.348654  | -1.235930 | -0.014958 |
| C | 0.634809  | -0.211599 | -0.604421 |
| C | 4.578569  | 0.128039  | 0.806068  |
| C | -0.657692 | -0.329985 | -0.766051 |
| C | -1.955343 | -0.379956 | -0.879076 |
| H | 3.172504  | -2.062252 | 0.254337  |
| H | 5.020802  | 1.061424  | 1.131299  |
| H | 2.953266  | -1.276595 | -1.312907 |
| C | -2.956293 | 0.029926  | 0.185608  |
| H | -2.398015 | -0.745204 | -1.805828 |
| H | 5.175784  | -0.769312 | 0.911117  |
| H | 0.739314  | 1.861700  | -1.071723 |
| H | 1.939890  | 0.885340  | -1.905276 |
| H | 1.918436  | 1.448404  | 1.092933  |
| H | 3.030620  | 2.184413  | -0.052603 |
| C | -3.849633 | 1.129901  | -0.398635 |
| C | -3.817476 | -1.190934 | 0.527473  |
| C | -2.257399 | 0.540670  | 1.439928  |
| H | -2.996869 | 0.829360  | 2.188391  |
| H | -1.614385 | -0.229544 | 1.868538  |
| H | -1.637558 | 1.409903  | 1.213759  |
| H | -4.585780 | -0.917567 | 1.253044  |
| H | -4.313640 | -1.579282 | -0.363685 |
| H | -3.207284 | -1.987733 | 0.954787  |
| H | -4.616823 | 1.414336  | 0.323795  |
| H | -3.262525 | 2.015809  | -0.644636 |
| H | -4.347872 | 0.785674  | -1.306603 |

### 6 BH2 E

SCF Energy: -411.467140959  
 Num. Imaginary Frequencies: 0

|   |           |           |           |
|---|-----------|-----------|-----------|
| C | -0.647607 | 1.324824  | 0.113763  |
| C | 0.796066  | 1.756667  | 0.189907  |
| C | 1.686218  | 0.769315  | -0.568658 |
| C | 1.580986  | -0.626844 | -0.000779 |
| C | 0.292481  | -0.937363 | 0.734232  |
| C | -0.873116 | -0.171414 | 0.178161  |
| C | 2.545654  | -1.527738 | -0.126663 |
| C | -2.040075 | -0.674488 | -0.257387 |
| O | -1.562032 | 2.105872  | -0.003384 |
| H | 2.432911  | -2.533277 | 0.258323  |
| H | 3.478162  | -1.283830 | -0.620307 |
| H | 1.366659  | 0.750067  | -1.614859 |
| H | 2.721914  | 1.104105  | -0.563242 |
| H | 0.417759  | -0.619405 | 1.776907  |
| B | -2.421360 | -2.169392 | -0.279832 |
| H | -2.755098 | 0.069500  | -0.598746 |
| H | 1.079061  | 1.779312  | 1.247232  |
| H | 0.877350  | 2.769873  | -0.196500 |
| H | 0.100750  | -2.005989 | 0.752044  |
| H | -3.545213 | -2.487796 | -0.502239 |
| H | -1.614837 | -3.020337 | -0.087843 |

### 6 BH2 Z

SCF Energy: -411.512686802

Num. Imaginary Frequencies: 0

|   |           |           |           |
|---|-----------|-----------|-----------|
| C | -0.805645 | -1.315742 | 0.394555  |
| C | 0.573719  | -0.757716 | 0.150273  |
| C | 0.781482  | 0.649453  | -0.047318 |
| C | -0.318225 | 1.648959  | -0.073790 |
| C | -1.594225 | 1.082822  | 0.564368  |
| C | -1.869690 | -0.304400 | 0.047828  |
| C | 1.786850  | -1.359145 | 0.069095  |
| B | 2.889028  | -0.259214 | -0.196293 |
| O | 1.984038  | 0.998874  | -0.230334 |
| C | -2.941967 | -0.605289 | -0.672721 |
| H | -3.101966 | -1.606207 | -1.053479 |
| H | -3.694222 | 0.140381  | -0.897592 |
| H | -1.456974 | 1.042771  | 1.648494  |
| H | -2.432231 | 1.745802  | 0.360112  |
| H | -0.948378 | -2.238251 | -0.166636 |
| H | 1.900571  | -2.431883 | 0.178021  |
| H | -0.500370 | 1.883240  | -1.127530 |
| H | 0.016255  | 2.569775  | 0.403264  |
| H | -0.897613 | -1.567421 | 1.456271  |
| H | 3.687610  | -0.120576 | 0.700062  |
| H | 3.436078  | -0.346210 | -1.270590 |

**6 CHO E**

SCF Energy: -499.367254020

Num. Imaginary Frequencies: 0

|   |           |           |           |
|---|-----------|-----------|-----------|
| C | 0.390962  | 1.544755  | 0.117789  |
| C | 1.881367  | 1.319098  | 0.120710  |
| C | 2.222392  | 0.031355  | -0.634168 |
| C | 1.558983  | -1.176916 | -0.013934 |
| C | 0.319931  | -0.890264 | 0.810952  |
| C | -0.440136 | 0.290155  | 0.275807  |
| C | 2.020647  | -2.409719 | -0.168510 |
| C | -1.725154 | 0.344585  | -0.083302 |
| O | -0.115533 | 2.632599  | -0.015903 |
| H | 1.507651  | -3.263024 | 0.256353  |
| H | 2.928658  | -2.600394 | -0.726767 |
| H | 1.875249  | 0.134106  | -1.666448 |
| H | 3.300612  | -0.110322 | -0.678713 |
| H | 0.643819  | -0.623247 | 1.824130  |
| C | -2.662878 | -0.785174 | -0.037190 |
| H | -2.131881 | 1.281329  | -0.446664 |
| H | 2.203916  | 1.239509  | 1.163712  |
| H | 2.365259  | 2.192081  | -0.310417 |
| H | -0.291635 | -1.782036 | 0.906575  |
| O | -3.825120 | -0.672157 | -0.351916 |
| H | -2.273109 | -1.758783 | 0.291866  |

**6 CHO Z**

SCF Energy: -499.366435623

Num. Imaginary Frequencies: 0

|   |           |           |           |
|---|-----------|-----------|-----------|
| C | -0.219734 | 1.223414  | 0.281625  |
| C | 1.167558  | 1.702735  | -0.076848 |
| C | 1.942284  | 0.642779  | -0.860145 |
| C | 2.070287  | -0.642654 | -0.078904 |
| C | 0.930784  | -0.930064 | 0.882832  |
| C | -0.341072 | -0.268736 | 0.431954  |
| C | 3.097302  | -1.470166 | -0.210121 |
| C | -1.457731 | -0.944998 | 0.149126  |
| O | -1.146078 | 1.976522  | 0.470723  |
| H | 3.145207  | -2.402836 | 0.337508  |
| H | 3.921678  | -1.236952 | -0.872151 |
| H | 1.401738  | 0.436657  | -1.789046 |
| H | 2.925093  | 1.014869  | -1.142708 |
| H | 1.198121  | -0.513814 | 1.860927  |
| H | -1.483173 | -2.021307 | 0.283489  |
| C | -2.699511 | -0.360044 | -0.388051 |
| H | 1.678251  | 1.925710  | 0.865883  |
| H | 1.074003  | 2.639316  | -0.622695 |
| H | 0.787692  | -2.000391 | 1.014734  |
| O | -3.719863 | -1.005671 | -0.469031 |
| H | -2.662083 | 0.678340  | -0.738288 |

**6 CN E**

SCF Energy: -478.292319942

Num. Imaginary Frequencies: 0

|   |           |           |           |
|---|-----------|-----------|-----------|
| C | 0.508282  | 1.540900  | 0.089557  |
| C | 1.932763  | 1.085336  | 0.257914  |
| C | 2.153855  | -0.229020 | -0.497960 |
| C | 1.241854  | -1.331232 | -0.006498 |
| C | -0.015499 | -0.878402 | 0.708765  |
| C | -0.515163 | 0.433917  | 0.188430  |
| C | 1.514605  | -2.616589 | -0.179428 |
| C | -1.762843 | 0.705467  | -0.194182 |
| O | 0.187306  | 2.684228  | -0.125389 |
| H | 0.830456  | -3.388850 | 0.147960  |
| H | 2.434026  | -2.933286 | -0.655643 |
| H | 1.956987  | -0.054084 | -1.559429 |
| H | 3.194475  | -0.538296 | -0.419798 |
| H | 0.230909  | -0.729124 | 1.767075  |
| C | -2.805518 | -0.269997 | -0.156103 |
| H | -2.025349 | 1.694064  | -0.547866 |
| H | 2.109657  | 0.935767  | 1.327750  |
| H | 2.596220  | 1.875236  | -0.084863 |
| H | -0.787142 | -1.644681 | 0.668538  |
| N | -3.650386 | -1.047551 | -0.129083 |

**6 CN Z**

SCF Energy: -478.290242381

Num. Imaginary Frequencies: 0

|   |           |           |           |
|---|-----------|-----------|-----------|
| C | -0.446542 | 1.050946  | 0.283353  |
| C | 0.890980  | 1.737325  | 0.175767  |
| C | 1.849353  | 0.912722  | -0.687662 |
| C | 2.079720  | -0.466540 | -0.114563 |
| C | 0.971249  | -0.998066 | 0.772844  |
| C | -0.369299 | -0.450562 | 0.380667  |
| C | 3.173646  | -1.173927 | -0.358205 |
| C | -1.414341 | -1.233228 | 0.109088  |
| O | -1.500744 | 1.638355  | 0.288138  |
| H | 3.299035  | -2.174526 | 0.035303  |
| H | 3.977537  | -0.769953 | -0.960619 |
| H | 1.414279  | 0.811944  | -1.686343 |
| H | 2.796486  | 1.434774  | -0.809319 |
| H | 1.169240  | -0.665901 | 1.798953  |
| H | -1.320187 | -2.310612 | 0.162873  |
| C | -2.711476 | -0.771872 | -0.281857 |
| H | 1.291096  | 1.838386  | 1.189852  |
| H | 0.734032  | 2.738103  | -0.219247 |
| H | 0.963610  | -2.085806 | 0.785311  |
| N | -3.779845 | -0.509148 | -0.611210 |

**6 F E**

SCF Energy: -485.291783365

Num. Imaginary Frequencies: 0

|   |           |           |           |
|---|-----------|-----------|-----------|
| C | -0.606265 | 1.338234  | 0.101334  |
| C | 0.829854  | 1.756731  | 0.295746  |
| C | 1.759022  | 0.813498  | -0.475887 |
| C | 1.627805  | -0.620999 | -0.014158 |
| C | 0.327484  | -0.972180 | 0.679206  |
| C | -0.817340 | -0.134869 | 0.180624  |
| C | 2.587966  | -1.517916 | -0.192962 |
| C | -1.987946 | -0.609885 | -0.217397 |
| O | -1.499573 | 2.127539  | -0.120220 |
| H | 2.461920  | -2.548524 | 0.113845  |
| H | 3.530282  | -1.246297 | -0.652363 |
| H | 1.499152  | 0.867988  | -1.537017 |
| H | 2.792684  | 1.144128  | -0.389531 |
| H | 0.448034  | -0.772858 | 1.749733  |
| F | -2.261500 | -1.914976 | -0.200260 |
| H | -2.806255 | -0.007615 | -0.585206 |
| H | 1.052107  | 1.703554  | 1.366339  |
| H | 0.939723  | 2.791291  | -0.020114 |
| H | 0.108961  | -2.032884 | 0.579374  |

**6 F Z**

SCF Energy: -485.288144348

Num. Imaginary Frequencies: 0

|   |           |           |           |
|---|-----------|-----------|-----------|
| C | -0.793056 | 0.990663  | 0.201936  |
| C | 0.515671  | 1.747289  | 0.228315  |
| C | 1.582231  | 1.010376  | -0.586770 |
| C | 1.845247  | -0.378040 | -0.048770 |
| C | 0.715655  | -0.979883 | 0.759346  |
| C | -0.629579 | -0.488543 | 0.288398  |
| C | 2.982928  | -1.026037 | -0.258794 |
| C | -1.572557 | -1.349793 | -0.071650 |
| O | -1.865031 | 1.546151  | 0.109540  |
| H | 3.134509  | -2.033271 | 0.108348  |
| H | 3.797470  | -0.566888 | -0.805086 |
| H | 1.229892  | 0.927645  | -1.619076 |
| H | 2.505696  | 1.586163  | -0.616088 |
| H | 0.842615  | -0.674751 | 1.803567  |
| H | -1.453128 | -2.425632 | -0.054348 |
| F | -2.772124 | -0.983584 | -0.515430 |
| H | 0.832804  | 1.827051  | 1.273149  |
| H | 0.337732  | 2.754060  | -0.142289 |
| H | 0.762535  | -2.067531 | 0.742304  |

**6 H**

SCF Energy: -386.038472841

Num. Imaginary Frequencies: 0

|   |           |           |           |
|---|-----------|-----------|-----------|
| C | 0.274032  | -1.588563 | 0.340812  |
| C | -1.009188 | -1.260743 | -0.428977 |
| C | -1.595257 | 0.071967  | -0.016810 |
| C | -0.623497 | 1.037300  | 0.627603  |
| C | 0.773427  | 0.879965  | 0.089315  |
| C | 1.514615  | 1.867963  | -0.397096 |
| C | 1.312774  | -0.520672 | 0.096853  |
| O | 2.480676  | -0.774664 | -0.097639 |
| C | -2.872273 | 0.377706  | -0.203167 |
| H | -3.264585 | 1.350177  | 0.066323  |
| H | -3.563563 | -0.337322 | -0.631913 |
| H | -0.770272 | -1.225285 | -1.495865 |
| H | -1.744292 | -2.053404 | -0.299618 |
| H | -0.596788 | 0.819664  | 1.701896  |
| H | 1.144816  | 2.884147  | -0.440313 |
| H | 2.512893  | 1.671529  | -0.765719 |
| H | 0.066952  | -1.613236 | 1.415506  |
| H | 0.688080  | -2.553453 | 0.057977  |
| H | -0.966450 | 2.064949  | 0.521641  |

**6 Me E**

SCF Energy: -425.351352129



## 2 *CARTESIAN COORDINATES*

Num. Imaginary Frequencies: 0

|   |           |           |           |
|---|-----------|-----------|-----------|
| C | -0.351964 | 1.436532  | 0.095060  |
| C | 1.136187  | 1.633419  | 0.266682  |
| C | 1.901414  | 0.544156  | -0.490227 |
| C | 1.537164  | -0.842035 | -0.005567 |
| C | 0.222794  | -0.944027 | 0.737715  |
| C | -0.807786 | 0.015294  | 0.198829  |
| C | 2.314162  | -1.896924 | -0.212835 |
| C | -2.044381 | -0.285713 | -0.201800 |
| O | -1.102908 | 2.362849  | -0.129674 |
| H | 2.020307  | -2.887002 | 0.112325  |
| H | 3.269003  | -1.800635 | -0.715083 |
| H | 1.652573  | 0.623651  | -1.552308 |
| H | 2.975438  | 0.704113  | -0.408124 |
| H | 0.409645  | -0.684185 | 1.786427  |
| C | -2.704860 | -1.620641 | -0.212947 |
| H | -2.643619 | 0.544516  | -0.563330 |
| H | 1.362924  | 1.572358  | 1.335779  |
| H | 1.399248  | 2.631816  | -0.074484 |
| H | -0.134585 | -1.970282 | 0.733480  |
| H | -3.068523 | -1.847995 | -1.216466 |
| H | -2.053137 | -2.426369 | 0.112698  |
| H | -3.582393 | -1.603142 | 0.437023  |

### 6 Me Z

SCF Energy: -425.348815421

Num. Imaginary Frequencies: 0

|   |           |           |           |
|---|-----------|-----------|-----------|
| C | -0.730200 | 1.008810  | 0.234960  |
| C | 0.589536  | 1.743639  | 0.130018  |
| C | 1.606743  | 0.936049  | -0.678331 |
| C | 1.870530  | -0.414362 | -0.053096 |
| C | 0.746272  | -0.948330 | 0.809216  |
| C | -0.604824 | -0.473073 | 0.330249  |
| C | 2.999632  | -1.084734 | -0.240866 |
| C | -1.576186 | -1.315363 | -0.032506 |
| O | -1.790856 | 1.599254  | 0.248549  |
| H | 3.150756  | -2.066569 | 0.190088  |
| H | 3.806884  | -0.670721 | -0.832450 |
| H | 1.203578  | 0.784361  | -1.684138 |
| H | 2.536793  | 1.490465  | -0.793022 |
| H | 0.902415  | -0.581691 | 1.830351  |
| H | -1.353741 | -2.375485 | 0.057107  |
| C | -2.932346 | -0.987942 | -0.565409 |
| H | 0.959496  | 1.897983  | 1.149081  |
| H | 0.403566  | 2.724519  | -0.302200 |
| H | 0.777572  | -2.035641 | 0.856167  |
| H | -3.234269 | -1.736782 | -1.296572 |
| H | -3.668172 | -1.014083 | 0.242514  |
| H | -2.972969 | 0.001445  | -1.010728 |

### 6 NH2 E

SCF Energy: -441.414436781

Num. Imaginary Frequencies: 0

|   |           |           |           |
|---|-----------|-----------|-----------|
| C | -0.449100 | 1.366526  | 0.071526  |
| C | 1.004662  | 1.657222  | 0.381060  |
| C | 1.906817  | 0.677480  | -0.374146 |
| C | 1.597513  | -0.762922 | -0.028395 |
| C | 0.256269  | -1.004891 | 0.631794  |
| C | -0.803267 | -0.042779 | 0.154773  |
| C | 2.445474  | -1.751260 | -0.283464 |
| C | -2.068999 | -0.400862 | -0.176616 |
| O | -1.223170 | 2.267163  | -0.235818 |
| H | 2.196548  | -2.781133 | -0.059451 |
| H | 3.416045  | -1.559485 | -0.724748 |
| H | 1.749490  | 0.823464  | -1.446523 |
| H | 2.956885  | 0.893965  | -0.180285 |
| H | 0.388140  | -0.892175 | 1.714879  |
| N | -2.604762 | -1.629214 | -0.133265 |
| H | -2.741214 | 0.379966  | -0.511740 |
| H | 1.155869  | 1.541888  | 1.458950  |
| H | 1.220869  | 2.690196  | 0.118390  |
| H | -0.037866 | -2.042056 | 0.471692  |
| H | -3.543941 | -1.787948 | -0.448280 |
| H | -2.078353 | -2.430578 | 0.167329  |

**6 NH2 Z**

SCF Energy: -441.417568915

Num. Imaginary Frequencies: 0

|   |           |           |           |
|---|-----------|-----------|-----------|
| C | -0.720187 | 0.962407  | 0.150782  |
| C | 0.577732  | 1.708102  | 0.372575  |
| C | 1.707604  | 1.037931  | -0.417585 |
| C | 1.866935  | -0.426578 | -0.062113 |
| C | 0.717757  | -1.028052 | 0.715099  |
| C | -0.614754 | -0.470914 | 0.273993  |
| C | 2.938184  | -1.129182 | -0.408509 |
| C | -1.673453 | -1.285553 | -0.007779 |
| O | -1.758741 | 1.562574  | -0.144161 |
| H | 3.022003  | -2.182500 | -0.171439 |
| H | 3.764330  | -0.672188 | -0.940002 |
| H | 1.475538  | 1.118614  | -1.482894 |
| H | 2.647014  | 1.567725  | -0.262125 |
| H | 0.878369  | -0.795320 | 1.775134  |
| H | -1.543561 | -2.360409 | 0.062591  |
| N | -2.896235 | -0.890767 | -0.374535 |
| H | 0.811253  | 1.683632  | 1.441523  |
| H | 0.444100  | 2.747121  | 0.079858  |
| H | 0.731071  | -2.114661 | 0.632493  |
| H | -3.605532 | -1.563898 | -0.598517 |
| H | -3.079924 | 0.097697  | -0.460367 |

**6 NO2 E**

SCF Energy: -590.550669141

Num. Imaginary Frequencies: 0

|   |           |           |           |
|---|-----------|-----------|-----------|
| C | 0.797305  | 1.558943  | 0.157918  |
| C | 2.245362  | 1.166028  | 0.248198  |
| C | 2.492722  | -0.092828 | -0.586361 |
| C | 1.663586  | -1.257491 | -0.099369 |
| C | 0.405544  | -0.914634 | 0.674887  |
| C | -0.182457 | 0.397205  | 0.249699  |
| C | 2.005484  | -2.519220 | -0.318199 |
| C | -1.434284 | 0.697192  | -0.068749 |
| O | 0.417144  | 2.694121  | 0.017830  |
| H | 1.380052  | -3.339602 | 0.009567  |
| H | 2.925457  | -2.767079 | -0.832516 |
| H | 2.229512  | 0.122748  | -1.625918 |
| H | 3.549764  | -0.351580 | -0.577946 |
| H | 0.672125  | -0.803140 | 1.733525  |
| N | -2.534580 | -0.255065 | -0.072108 |
| H | -1.742145 | 1.671815  | -0.412049 |
| H | 2.472901  | 0.967895  | 1.300284  |
| H | 2.853982  | 2.006308  | -0.075662 |
| H | -0.314640 | -1.722356 | 0.619736  |
| O | -3.433646 | -0.020880 | -0.852573 |
| O | -2.514064 | -1.199581 | 0.686942  |

**6 NO2 Z**

SCF Energy: -590.548071538

Num. Imaginary Frequencies: 0

|   |           |           |           |
|---|-----------|-----------|-----------|
| C | -0.127439 | -0.526397 | 0.318412  |
| C | 0.110453  | 0.947018  | 0.537559  |
| C | 1.034492  | 1.555240  | -0.489183 |
| C | 1.880086  | 0.474181  | -1.187020 |
| C | 2.303146  | -0.558916 | -0.177078 |
| C | 1.146765  | -1.321067 | 0.452893  |
| O | -0.293630 | 1.518304  | 1.516195  |
| C | 3.562329  | -0.773349 | 0.175350  |
| C | -1.276888 | -1.082889 | -0.021942 |
| N | -2.481169 | -0.293108 | -0.237517 |
| H | 3.820861  | -1.496509 | 0.938633  |
| H | 4.372895  | -0.234497 | -0.297917 |
| H | 1.278713  | -0.006186 | -1.963619 |
| H | 2.742898  | 0.926840  | -1.669952 |
| H | 1.349449  | -1.498399 | 1.511077  |
| H | -1.450607 | -2.137938 | -0.159776 |
| H | 1.659397  | 2.284981  | 0.024848  |
| H | 0.412224  | 2.093071  | -1.208488 |
| H | 1.018163  | -2.292971 | -0.025448 |
| O | -3.533972 | -0.892279 | -0.179229 |
| O | -2.376583 | 0.890278  | -0.479551 |

**6 OH E**

SCF Energy: -461.280155789

Num. Imaginary Frequencies: 0

|   |           |           |           |
|---|-----------|-----------|-----------|
| C | -0.512429 | 1.362596  | 0.084842  |
| C | 0.938322  | 1.702533  | 0.336882  |
| C | 1.843324  | 0.728516  | -0.424763 |
| C | 1.605009  | -0.710302 | -0.019445 |
| C | 0.285047  | -0.987554 | 0.667929  |
| C | -0.810626 | -0.078221 | 0.178208  |
| C | 2.493954  | -1.668452 | -0.246745 |
| C | -2.026913 | -0.497135 | -0.186687 |
| O | -1.338317 | 2.214932  | -0.191144 |
| H | 2.292878  | -2.698709 | 0.018928  |
| H | 3.450527  | -1.450291 | -0.705729 |
| H | 1.635744  | 0.832273  | -1.493557 |
| H | 2.890674  | 0.991689  | -0.283334 |
| H | 0.422230  | -0.820630 | 1.742689  |
| O | -2.384016 | -1.788667 | -0.136099 |
| H | -2.770426 | 0.208245  | -0.538580 |
| H | 1.124303  | 1.616696  | 1.412111  |
| H | 1.114069  | 2.735230  | 0.045142  |
| H | 0.002945  | -2.031571 | 0.548614  |
| H | -3.278406 | -1.904945 | -0.469671 |

**6 OH Z**

SCF Energy: -461.275012386

Num. Imaginary Frequencies: 0

|   |           |           |           |
|---|-----------|-----------|-----------|
| C | -0.730207 | 1.027564  | 0.162971  |
| C | 0.603286  | 1.731960  | 0.302952  |
| C | 1.681334  | 0.996820  | -0.499516 |
| C | 1.837634  | -0.441632 | -0.053867 |
| C | 0.685285  | -0.986924 | 0.758297  |
| C | -0.642435 | -0.439359 | 0.289397  |
| C | 2.905888  | -1.170195 | -0.350237 |
| C | -1.645143 | -1.275154 | -0.017415 |
| O | -1.757607 | 1.641595  | -0.055936 |
| H | 2.982944  | -2.206997 | -0.047760 |
| H | 3.736246  | -0.750667 | -0.905123 |
| H | 1.394951  | 1.010888  | -1.554750 |
| H | 2.633553  | 1.520748  | -0.427504 |
| H | 0.839524  | -0.690008 | 1.802014  |
| H | -1.495727 | -2.347409 | 0.062638  |
| O | -2.856564 | -0.887151 | -0.436088 |
| H | 0.872826  | 1.741559  | 1.363650  |
| H | 0.486438  | 2.762869  | -0.022790 |
| H | 0.685113  | -2.076027 | 0.741349  |
| H | -3.396350 | -1.658979 | -0.631016 |

**6 OMe E**

SCF Energy: -500.571717684

Num. Imaginary Frequencies: 0

|   |           |           |           |
|---|-----------|-----------|-----------|
| C | 0.419553  | 1.520048  | 0.090391  |
| C | 1.912020  | 1.347466  | 0.255719  |
| C | 2.382959  | 0.106848  | -0.510058 |
| C | 1.693685  | -1.154178 | -0.035041 |
| C | 0.401573  | -0.948144 | 0.726444  |
| C | -0.345329 | 0.272269  | 0.257928  |
| C | 2.188788  | -2.363240 | -0.265580 |
| C | -1.655202 | 0.290214  | -0.021117 |
| O | -0.080193 | 2.598919  | -0.178473 |
| H | 1.665958  | -3.256796 | 0.051710  |
| H | 3.133434  | -2.495003 | -0.779003 |
| H | 2.158396  | 0.253048  | -1.570439 |
| H | 3.463838  | -0.002003 | -0.432078 |
| H | 0.651301  | -0.818854 | 1.786119  |
| O | -2.432250 | -0.785065 | 0.103932  |
| H | -2.132868 | 1.203527  | -0.363535 |
| H | 2.122892  | 1.225788  | 1.322893  |
| H | 2.410975  | 2.251083  | -0.086328 |
| H | -0.227292 | -1.833559 | 0.660895  |
| C | -3.790208 | -0.616706 | -0.299596 |
| H | -4.287577 | -1.563109 | -0.116074 |
| H | -4.264196 | 0.169286  | 0.287540  |
| H | -3.842349 | -0.371706 | -1.359909 |

**6 OMe Z**

SCF Energy: -500.566524800

Num. Imaginary Frequencies: 0

|   |           |           |           |
|---|-----------|-----------|-----------|
| C | -0.019223 | 1.295806  | 0.180142  |
| C | 1.454669  | 1.646213  | 0.173333  |
| C | 2.245336  | 0.613129  | -0.635218 |
| C | 2.082736  | -0.784900 | -0.078512 |
| C | 0.893470  | -0.972878 | 0.835926  |
| C | -0.287758 | -0.135867 | 0.404526  |
| C | 2.920721  | -1.772216 | -0.366165 |
| C | -1.486622 | -0.709949 | 0.211700  |
| O | -0.876431 | 2.138982  | -0.007868 |
| H | 2.766728  | -2.772550 | 0.018715  |
| H | 3.786902  | -1.609118 | -0.995859 |
| H | 1.877995  | 0.627919  | -1.665211 |
| H | 3.299432  | 0.884461  | -0.675564 |
| H | 1.193730  | -0.664661 | 1.844035  |
| H | -1.598879 | -1.783060 | 0.355503  |
| O | -2.590148 | -0.065170 | -0.158900 |
| H | 1.807054  | 1.654346  | 1.209496  |
| H | 1.569054  | 2.650743  | -0.227328 |
| H | 0.621810  | -2.025692 | 0.900817  |
| C | -3.726114 | -0.893873 | -0.399598 |
| H | -4.547375 | -0.229071 | -0.645275 |
| H | -3.534646 | -1.567393 | -1.234651 |
| H | -3.972460 | -1.469212 | 0.492660  |

**6 tBut E**

SCF Energy: -543.273816412

Num. Imaginary Frequencies: 0

|   |           |           |           |
|---|-----------|-----------|-----------|
| C | 1.238397  | 1.582484  | 0.089233  |
| C | 2.667377  | 1.092885  | 0.157146  |
| C | 2.806599  | -0.251003 | -0.563379 |
| C | 1.886912  | -1.302045 | 0.020213  |
| C | 0.751515  | -0.766040 | 0.862858  |
| C | 0.202797  | 0.516246  | 0.286951  |
| C | 2.053171  | -2.600471 | -0.194702 |
| C | -1.046209 | 0.781386  | -0.101867 |
| O | 0.967113  | 2.743984  | -0.130183 |
| H | 1.361930  | -3.331334 | 0.206103  |
| H | 2.887108  | -2.971028 | -0.778269 |
| H | 2.553721  | -0.106184 | -1.617264 |
| H | 3.839965  | -0.593502 | -0.534428 |
| H | 1.144785  | -0.542933 | 1.861776  |
| C | -2.273961 | -0.105027 | -0.081475 |
| H | -1.197433 | 1.781872  | -0.500124 |
| H | 2.932809  | 0.978822  | 1.212783  |
| H | 3.316542  | 1.854832  | -0.267639 |
| H | -0.010377 | -1.525764 | 0.994935  |
| C | -3.445649 | 0.686536  | -0.672028 |
| C | -2.053923 | -1.355284 | -0.945819 |
| C | -2.636713 | -0.502582 | 1.356291  |
| H | -3.553024 | -1.095721 | 1.350563  |
| H | -1.855363 | -1.092311 | 1.831933  |
| H | -2.809574 | 0.384804  | 1.966497  |
| H | -2.964753 | -1.956712 | -0.955350 |
| H | -1.821809 | -1.072296 | -1.973344 |
| H | -1.240988 | -1.978641 | -0.577136 |
| H | -4.350449 | 0.077567  | -0.676717 |
| H | -3.640979 | 1.585460  | -0.085041 |
| H | -3.230903 | 0.988692  | -1.698345 |

**6 tBut Z**

SCF Energy: -543.269292847

Num. Imaginary Frequencies: 0

## 2 CARTESIAN COORDINATES

|   |           |           |           |
|---|-----------|-----------|-----------|
| C | -0.480274 | 1.308834  | -0.294522 |
| C | -1.887533 | 1.646716  | 0.158235  |
| C | -2.535542 | 0.480710  | 0.903649  |
| C | -2.602625 | -0.753167 | 0.036238  |
| C | -1.509993 | -0.847432 | -1.008566 |
| C | -0.247799 | -0.143928 | -0.554850 |
| C | -3.539312 | -1.682562 | 0.170848  |
| C | 0.894323  | -0.814115 | -0.375238 |
| O | 0.350858  | 2.173322  | -0.468787 |
| H | -3.541903 | -2.573727 | -0.444372 |
| H | -4.331686 | -1.579210 | 0.901833  |
| H | -1.927070 | 0.256237  | 1.785374  |
| H | -3.526832 | 0.750795  | 1.263607  |
| H | -1.872296 | -0.363297 | -1.922597 |
| H | 0.840003  | -1.870986 | -0.631347 |
| C | 2.255378  | -0.391339 | 0.144415  |
| H | -2.465645 | 1.889755  | -0.739401 |
| H | -1.838909 | 2.550007  | 0.763404  |
| H | -1.302784 | -1.885989 | -1.260000 |
| C | 3.032654  | -1.671273 | 0.478549  |
| C | 3.016397  | 0.371632  | -0.949184 |
| C | 2.165763  | 0.455885  | 1.418026  |
| H | 3.171545  | 0.626682  | 1.806410  |
| H | 1.707969  | 1.423408  | 1.234073  |
| H | 1.591176  | -0.065579 | 2.185512  |
| H | 4.024265  | 0.603793  | -0.598495 |
| H | 3.103733  | -0.233697 | -1.853074 |
| H | 2.503370  | 1.298374  | -1.195516 |
| H | 4.029670  | -1.421884 | 0.843293  |
| H | 2.520303  | -2.247875 | 1.250911  |
| H | 3.139607  | -2.303139 | -0.404922 |

### TS 2 BH2 E boat

SCF Energy: -298.013997014  
 Num. Imaginary Frequencies: 1  
 Imaginary Frequency: -685.1039

|   |           |           |           |
|---|-----------|-----------|-----------|
| C | 0.031690  | 1.365852  | 0.015976  |
| C | -1.298681 | 1.295970  | 0.393681  |
| C | -2.210462 | 0.565750  | -0.363739 |
| C | -1.491930 | -1.327860 | -0.304417 |
| C | -0.332734 | -1.336238 | 0.475832  |
| C | 0.762594  | -0.564933 | 0.184537  |
| C | 2.072675  | -0.631030 | -0.077218 |
| B | 3.077637  | 0.514873  | -0.203218 |
| H | -0.426279 | -1.610297 | 1.525096  |
| H | -1.367445 | -1.346621 | -1.378461 |
| H | -2.120151 | 0.613442  | -1.440913 |
| H | -1.537479 | 1.481592  | 1.436142  |
| H | 0.733617  | 1.900012  | 0.638929  |
| H | -2.338421 | -1.895660 | 0.058480  |
| H | -3.225313 | 0.456779  | -0.003857 |
| H | 2.439285  | -1.648545 | -0.205060 |
| H | 0.268122  | 1.355864  | -1.042320 |
| H | 4.232190  | 0.256946  | -0.342500 |
| H | 2.754773  | 1.657051  | -0.177367 |

### TS 2 BH2 E chair

SCF Energy: -298.045800963  
 Num. Imaginary Frequencies: 1  
 Imaginary Frequency: -376.3349

|   |           |           |           |
|---|-----------|-----------|-----------|
| C | 0.204180  | -1.338115 | 0.188549  |
| C | -0.989457 | -1.196515 | -0.478577 |
| C | -2.116652 | -0.529004 | 0.178554  |
| C | -1.847183 | 1.005352  | 0.027123  |
| C | -0.397135 | 1.290530  | 0.172274  |
| C | 0.636830  | 0.467463  | -0.032109 |
| C | 1.992219  | 0.589568  | -0.336100 |
| B | 3.106867  | -0.207354 | 0.232079  |
| H | -1.041139 | -1.410030 | -1.540189 |
| H | 0.210805  | -1.389171 | 1.270228  |
| H | 1.021268  | -1.841712 | -0.300275 |
| H | -0.121522 | 2.298773  | 0.464709  |
| H | -2.441516 | 1.572400  | 0.743170  |
| H | -2.185212 | 1.290828  | -0.970184 |
| H | -2.145297 | -0.772550 | 1.238837  |
| H | -3.073204 | -0.769530 | -0.277546 |
| H | 2.190112  | 1.396063  | -1.039663 |
| H | 4.244751  | 0.084476  | -0.002379 |
| H | 2.909791  | -1.158443 | 0.934622  |

### TS 2 BH2 Z boat

SCF Energy: -298.018949577  
 Num. Imaginary Frequencies: 1

Imaginary Frequency: -698.2037

|   |           |           |           |
|---|-----------|-----------|-----------|
| C | 0.569616  | -1.493960 | -0.138795 |
| C | 1.770032  | -0.973751 | 0.318382  |
| C | 2.341743  | 0.125882  | -0.320979 |
| C | 0.932824  | 1.557793  | -0.217395 |
| C | -0.151244 | 1.076179  | 0.526620  |
| C | -0.822053 | -0.070812 | 0.191415  |
| C | -2.026373 | -0.597470 | -0.048667 |
| B | -3.253551 | 0.301900  | -0.192947 |
| H | -2.104613 | -1.677996 | -0.124083 |
| H | -0.206676 | 1.341893  | 1.579865  |
| H | 0.822750  | 1.573914  | -1.293070 |
| H | 2.332239  | 0.135306  | -1.402871 |
| H | 2.038229  | -1.159161 | 1.353574  |
| H | 0.106627  | -2.322510 | 0.380947  |
| H | 1.469799  | 2.406932  | 0.184812  |
| H | 3.216513  | 0.586830  | 0.119335  |
| H | 0.372439  | -1.453715 | -1.205418 |
| H | -4.342937 | -0.169291 | -0.303357 |
| H | -3.123890 | 1.485123  | -0.188479 |

**TS 2 BH2 Z chair**

SCF Energy: -298.041859368

Num. Imaginary Frequencies: 1

Imaginary Frequency: -500.7100

|   |           |           |           |
|---|-----------|-----------|-----------|
| C | 0.355240  | 1.427769  | 0.260376  |
| C | 1.507255  | 0.971719  | -0.471407 |
| C | 2.302311  | -0.033967 | 0.073614  |
| C | 1.145829  | -1.458019 | -0.157766 |
| C | -0.105979 | -1.061640 | 0.377511  |
| C | -0.695441 | 0.187797  | 0.172711  |
| C | -2.020946 | 0.528585  | 0.040038  |
| B | -3.093587 | -0.465812 | -0.306885 |
| H | 1.561363  | 1.172056  | -1.535098 |
| H | 0.529509  | 1.586289  | 1.322341  |
| H | -0.143049 | 2.286341  | -0.175978 |
| H | -0.566024 | -1.700248 | 1.120714  |
| H | 1.607082  | -2.321806 | 0.314930  |
| H | 1.261347  | -1.492212 | -1.233407 |
| H | 2.427884  | -0.050363 | 1.149393  |
| H | 3.174233  | -0.360365 | -0.479691 |
| H | -2.258500 | 1.578831  | 0.189898  |
| H | -4.248913 | -0.154895 | -0.305123 |
| H | -2.806619 | -1.588028 | -0.604012 |

**TS 2 CH3 E boat**

SCF Energy: -311.890896144

Num. Imaginary Frequencies: 1

Imaginary Frequency: -673.5077

|   |           |           |           |
|---|-----------|-----------|-----------|
| C | -0.028403 | -1.335746 | 0.056973  |
| C | 1.311619  | -1.329476 | 0.399875  |
| C | 2.239166  | -0.645940 | -0.385093 |
| C | 1.629934  | 1.290582  | -0.327538 |
| C | 0.501984  | 1.361390  | 0.494818  |
| C | -0.636708 | 0.645942  | 0.216183  |
| C | -1.923252 | 0.716559  | -0.061148 |
| C | -2.894466 | -0.423680 | -0.199303 |
| H | 0.661393  | 1.616868  | 1.540277  |
| H | 1.467858  | 1.308762  | -1.396914 |
| H | 2.120545  | -0.697733 | -1.459463 |
| H | 1.566857  | -1.519294 | 1.437766  |
| H | -0.743978 | -1.828143 | 0.701882  |
| H | 2.525910  | 1.802311  | -0.000726 |
| H | 3.267874  | -0.592041 | -0.052705 |
| H | -2.322522 | 1.713322  | -0.227593 |
| H | -0.292616 | -1.317892 | -0.995006 |
| H | -2.915002 | -1.048852 | 0.693387  |
| H | -3.900423 | -0.046923 | -0.368039 |
| H | -2.635143 | -1.068168 | -1.041468 |

**TS 2 CH3 E chair**

SCF Energy: -311.906548327

Num. Imaginary Frequencies: 1

Imaginary Frequency: -606.8077

|   |           |           |           |
|---|-----------|-----------|-----------|
| C | 0.063639  | -1.216163 | 0.453300  |
| C | -1.102827 | -1.350137 | -0.307758 |
| C | -2.245393 | -0.604219 | 0.044039  |
| C | -1.747517 | 1.099837  | -0.354572 |
| C | -0.550969 | 1.345490  | 0.363002  |
| C | 0.575905  | 0.567187  | 0.148509  |
| C | 1.853217  | 0.711973  | -0.174087 |
| H | -1.009675 | -1.692744 | -1.332599 |
| H | -0.037476 | -1.164067 | 1.531749  |
| H | 0.928098  | -1.782111 | 0.132517  |
| H | -0.628372 | 1.844886  | 1.324530  |
| H | -2.606708 | 1.694926  | -0.060953 |
| H | -1.667904 | 1.008128  | -1.431616 |
| H | -2.466504 | -0.513926 | 1.101836  |
| H | -3.137883 | -0.739996 | -0.557174 |
| H | 2.149359  | 1.699576  | -0.513597 |
| C | 2.946371  | -0.320433 | -0.137479 |
| H | 3.918609  | 0.167017  | -0.090801 |
| H | 2.863726  | -0.981623 | 0.723266  |
| H | 2.940177  | -0.941281 | -1.036883 |

**TS 2 CH3 Z boat**

SCF Energy: -311.893089344

Num. Imaginary Frequencies: 1

Imaginary Frequency: -665.8530

|   |           |           |           |
|---|-----------|-----------|-----------|
| C | -0.703303 | -1.525755 | 0.103138  |
| C | -1.898532 | -0.962380 | -0.304873 |
| C | -2.426434 | 0.133052  | 0.379063  |
| C | -1.007425 | 1.578394  | 0.219014  |
| C | 0.022316  | 1.076755  | -0.582781 |
| C | 0.720088  | -0.052521 | -0.231124 |
| C | 1.895107  | -0.577443 | 0.041265  |
| C | 3.162978  | 0.217423  | 0.184943  |
| H | 1.979814  | -1.649550 | 0.189789  |
| H | -0.022770 | 1.296977  | -1.647400 |
| H | -0.843923 | 1.592463  | 1.288274  |
| H | -2.360187 | 0.128633  | 1.459237  |
| H | -2.199934 | -1.109633 | -1.337333 |
| H | -0.263617 | -2.336169 | -0.463590 |
| H | -1.579959 | 2.415728  | -0.158374 |
| H | -3.314491 | 0.614052  | -0.010316 |
| H | -0.467195 | -1.516434 | 1.160363  |
| H | 3.603301  | 0.067581  | 1.172456  |
| H | 3.904066  | -0.108426 | -0.547468 |
| H | 2.976125  | 1.279619  | 0.042503  |

**TS 2 CH3 Z chair**

SCF Energy: -311.909900923

Num. Imaginary Frequencies: 1

Imaginary Frequency: -597.3680

|   |           |           |           |
|---|-----------|-----------|-----------|
| C | 0.632193  | 1.477460  | 0.385304  |
| C | 1.640108  | 1.013406  | -0.463153 |
| C | 2.356464  | -0.146083 | -0.097088 |
| C | 1.117003  | -1.467605 | -0.240580 |
| C | 0.016246  | -1.077713 | 0.564485  |
| C | -0.654385 | 0.099992  | 0.282865  |
| C | -1.854913 | 0.560260  | -0.025165 |
| H | 1.593711  | 1.280241  | -1.513347 |
| H | 0.817088  | 1.442913  | 1.452982  |
| H | 0.060061  | 2.343353  | 0.075614  |
| H | -0.019856 | -1.438162 | 1.588802  |
| H | 1.651857  | -2.355245 | 0.082628  |
| H | 0.967215  | -1.453149 | -1.314166 |
| H | 2.636399  | -0.236769 | 0.946863  |
| H | 3.141057  | -0.481741 | -0.766560 |
| C | -3.044760 | -0.314808 | -0.299874 |
| H | -2.022219 | 1.630008  | -0.084552 |
| H | -3.488935 | -0.073441 | -1.267445 |
| H | -2.762971 | -1.365872 | -0.294312 |
| H | -3.821135 | -0.161590 | 0.452727  |

**TS 2 CHO E boat**

SCF Energy: -385.914570083

Num. Imaginary Frequencies: 1

Imaginary Frequency: -663.6600

## 2 CARTESIAN COORDINATES

|   |           |           |           |
|---|-----------|-----------|-----------|
| C | -0.408080 | -1.380596 | -0.072452 |
| C | -1.757801 | -1.319209 | -0.372176 |
| C | -2.635025 | -0.613926 | 0.446208  |
| C | -1.983245 | 1.305490  | 0.353111  |
| C | -0.878874 | 1.344539  | -0.499599 |
| C | 0.247921  | 0.601501  | -0.267278 |
| C | 1.549300  | 0.737250  | -0.036469 |
| C | 2.528626  | -0.344500 | 0.046901  |
| H | -1.041874 | 1.622425  | -1.538705 |
| H | -1.790389 | 1.318336  | 1.416888  |
| H | -2.474330 | -0.663536 | 1.514919  |
| H | -2.054417 | -1.499653 | -1.400191 |
| H | 0.250689  | -1.905624 | -0.750028 |
| H | -2.869389 | 1.845614  | 0.047979  |
| H | -3.672003 | -0.523737 | 0.150678  |
| H | 1.957587  | 1.732172  | 0.113114  |
| H | -0.108865 | -1.379217 | 0.969791  |
| O | 3.708088  | -0.144746 | 0.245391  |
| H | 2.161360  | -1.372102 | -0.077051 |

### TS 2 CHO E chair

SCF Energy: -385.943003419

Num. Imaginary Frequencies: 1

Imaginary Frequency: -359.6078

|   |           |           |           |
|---|-----------|-----------|-----------|
| C | -0.284501 | -1.328137 | 0.208740  |
| C | -1.478322 | -1.202249 | -0.472723 |
| C | -2.606164 | -0.524250 | 0.164606  |
| C | -2.318276 | 1.011908  | -0.000313 |
| C | -0.874381 | 1.288750  | 0.182158  |
| C | 0.156078  | 0.450228  | -0.000834 |
| C | 1.488251  | 0.606644  | -0.334756 |
| C | 2.541207  | -0.169638 | 0.212300  |
| H | -1.517492 | -1.423527 | -1.532996 |
| H | -0.300878 | -1.401239 | 1.289203  |
| H | 0.523150  | -1.855955 | -0.273997 |
| H | -0.599890 | 2.290199  | 0.496381  |
| H | -2.928717 | 1.596893  | 0.686687  |
| H | -2.625536 | 1.274681  | -1.013209 |
| H | -2.651918 | -0.752476 | 1.227502  |
| H | -3.559744 | -0.754133 | -0.302332 |
| H | 1.750134  | 1.373532  | -1.054398 |
| O | 3.741436  | -0.022902 | -0.024507 |
| H | 2.236049  | -0.964299 | 0.918152  |

### TS 2 CHO Z boat

SCF Energy: -385.920439264

Num. Imaginary Frequencies: 1

Imaginary Frequency: -683.0209

|   |           |           |           |
|---|-----------|-----------|-----------|
| C | 1.037440  | -1.500848 | -0.160453 |
| C | 2.245944  | -0.991995 | 0.288319  |
| C | 2.807188  | 0.123556  | -0.342375 |
| C | 1.440706  | 1.536234  | -0.239846 |
| C | 0.362940  | 1.085001  | 0.541027  |
| C | -0.297915 | -0.079416 | 0.249329  |
| C | -1.516870 | -0.578330 | 0.070233  |
| H | -1.713464 | -1.641519 | 0.005888  |
| H | 0.323209  | 1.385761  | 1.585067  |
| H | 1.291680  | 1.541306  | -1.311098 |
| H | 2.812015  | 0.125816  | -1.424558 |
| H | 2.524921  | -1.191841 | 1.317745  |
| H | 0.584789  | -2.342455 | 0.347826  |
| H | 1.984504  | 2.397060  | 0.127382  |
| H | 3.688119  | 0.570995  | 0.099971  |
| C | -2.657873 | 0.326801  | -0.068763 |
| H | 0.826675  | -1.440483 | -1.223535 |
| O | -3.806055 | -0.041407 | -0.186791 |
| H | -2.403368 | 1.400610  | -0.055181 |

### TS 2 CHO Z chair

SCF Energy: -385.943721196

Num. Imaginary Frequencies: 1

Imaginary Frequency: -440.9563

|   |           |           |           |
|---|-----------|-----------|-----------|
| C | -0.896817 | -1.448911 | 0.280616  |
| C | -1.979793 | -0.944467 | -0.515453 |
| C | -2.755252 | 0.106052  | -0.013605 |
| C | -1.568035 | 1.471578  | -0.161766 |
| C | -0.356476 | 1.037316  | 0.442844  |
| C | 0.192383  | -0.231839 | 0.247844  |
| C | 1.494997  | -0.611024 | 0.139502  |
| C | 2.520582  | 0.346359  | -0.179374 |
| H | -1.982524 | -1.144775 | -1.580325 |
| H | -1.133492 | -1.592814 | 1.331863  |
| H | -0.400762 | -2.322705 | -0.126770 |
| H | 0.072452  | 1.641821  | 1.232160  |
| H | -2.025971 | 2.346484  | 0.292952  |
| H | -1.603310 | 1.533112  | -1.242258 |
| H | -2.955082 | 0.110552  | 1.051326  |
| H | -3.586837 | 0.454525  | -0.614194 |
| H | 1.793340  | -1.644605 | 0.264123  |
| O | 3.720233  | 0.113660  | -0.203441 |
| H | 2.150785  | 1.358732  | -0.425002 |

### TS 2 CN E boat

SCF Energy: -364.839422993



Num. Imaginary Frequencies: 1

Imaginary Frequency: -682.8561

|   |           |           |           |
|---|-----------|-----------|-----------|
| C | 0.035487  | -1.242523 | 0.014445  |
| C | 1.346230  | -1.413558 | 0.422937  |
| C | 2.390439  | -0.858430 | -0.321868 |
| C | 2.043631  | 1.089507  | -0.353257 |
| C | 0.916731  | 1.366699  | 0.434830  |
| C | -0.286324 | 0.761877  | 0.196994  |
| C | -1.559929 | 1.047193  | -0.044557 |
| C | -2.595926 | 0.064504  | -0.090605 |
| H | 1.070344  | 1.704023  | 1.457043  |
| H | 1.898430  | 1.092223  | -1.424951 |
| H | 2.329837  | -0.947533 | -1.398533 |
| H | 1.523385  | -1.623897 | 1.472497  |
| H | -0.770202 | -1.636641 | 0.619988  |
| H | 2.983447  | 1.521165  | -0.034917 |
| H | 3.396707  | -0.928811 | 0.070418  |
| H | -1.872671 | 2.064225  | -0.245465 |
| H | -0.169304 | -1.194681 | -1.050612 |
| N | -3.447429 | -0.705956 | -0.145570 |

**TS 2 CN E chair**

SCF Energy: -364.864565855

Num. Imaginary Frequencies: 1

Imaginary Frequency: -351.6555

|   |           |           |           |
|---|-----------|-----------|-----------|
| C | 0.017447  | -1.213486 | 0.163269  |
| C | -1.212236 | -1.262893 | -0.468551 |
| C | -2.384206 | -0.720262 | 0.205486  |
| C | -2.276878 | 0.851697  | 0.014944  |
| C | -0.884690 | 1.298478  | 0.228710  |
| C | 0.233536  | 0.590736  | -0.020663 |
| C | 1.513688  | 0.907271  | -0.386517 |
| C | 2.629958  | 0.134156  | -0.013493 |
| N | 3.545093  | -0.510139 | 0.276946  |
| H | -1.261888 | -1.480831 | -1.529057 |
| H | 0.051938  | -1.298024 | 1.242904  |
| H | 0.872606  | -1.634591 | -0.346146 |
| H | -0.730920 | 2.283770  | 0.653857  |
| H | -2.969785 | 1.362132  | 0.682452  |
| H | -2.602073 | 1.041812  | -1.007672 |
| H | -2.370516 | -0.931064 | 1.272431  |
| H | -3.325071 | -1.048780 | -0.226596 |
| H | 1.700335  | 1.762368  | -1.019911 |

**TS 2 CN Z boat**

SCF Energy: -364.839863886

Num. Imaginary Frequencies: 1

Imaginary Frequency: -681.7536

|   |           |           |           |
|---|-----------|-----------|-----------|
| C | 1.060590  | -1.477702 | -0.211840 |
| C | 2.204552  | -0.870279 | 0.278070  |
| C | 2.665370  | 0.316905  | -0.306537 |
| C | 1.180960  | 1.576098  | -0.211413 |
| C | 0.136369  | 1.019573  | 0.549730  |
| C | -0.404260 | -0.195983 | 0.235543  |
| C | -1.560438 | -0.824744 | 0.051988  |
| C | -2.776096 | -0.087468 | -0.083751 |
| H | -1.637893 | -1.900939 | -0.024401 |
| H | 0.043136  | 1.309121  | 1.593446  |
| H | 1.039688  | 1.583081  | -1.283822 |
| H | 2.705824  | 0.345695  | -1.387636 |
| H | 2.482108  | -1.075844 | 1.306638  |
| H | 0.682607  | -2.375587 | 0.260405  |
| H | 1.631364  | 2.482995  | 0.171042  |
| H | 3.488413  | 0.831275  | 0.173102  |
| H | 0.859847  | -1.397925 | -1.275444 |
| N | -3.762483 | 0.494246  | -0.192010 |

**TS 2 CN Z chair**

SCF Energy: -364.864658755

Num. Imaginary Frequencies: 1

Imaginary Frequency: -332.9121

|   |           |           |           |
|---|-----------|-----------|-----------|
| C | 0.922556  | 1.563075  | 0.191779  |
| C | 1.732658  | 0.851506  | -0.674292 |
| C | 2.519724  | -0.262253 | -0.162677 |
| C | 1.494926  | -1.470152 | -0.020549 |
| C | 0.226693  | -0.992886 | 0.566147  |
| C | -0.315747 | 0.227924  | 0.396323  |
| C | -1.572188 | 0.758922  | 0.352630  |
| C | -2.649235 | -0.006945 | -0.138955 |
| H | 1.602952  | 0.963047  | -1.744480 |
| H | 1.236418  | 1.681785  | 1.221626  |
| H | 0.347037  | 2.387658  | -0.202845 |
| H | -0.315966 | -1.663467 | 1.223199  |
| H | 1.936596  | -2.271224 | 0.570228  |
| H | 1.350922  | -1.844732 | -1.033568 |
| H | 2.926648  | -0.052464 | 0.823832  |
| H | 3.314333  | -0.575932 | -0.833465 |
| H | -1.783853 | 1.773194  | 0.656717  |
| N | -3.538773 | -0.630431 | -0.534812 |

**TS 2 F E boat**

SCF Energy: -371.833609516

Num. Imaginary Frequencies: 1

Imaginary Frequency: -657.0264

## 2 *CARTESIAN COORDINATES*

|   |           |           |           |
|---|-----------|-----------|-----------|
| C | -0.047366 | -1.379070 | 0.016208  |
| C | 1.278492  | -1.314704 | 0.400412  |
| C | 2.200697  | -0.584379 | -0.354013 |
| C | 1.553639  | 1.311974  | -0.323623 |
| C | 0.421452  | 1.365459  | 0.498262  |
| C | -0.671922 | 0.587768  | 0.221371  |
| C | -1.943504 | 0.638756  | -0.080985 |
| F | -2.711905 | -0.471937 | -0.192031 |
| H | 0.556480  | 1.670233  | 1.532748  |
| H | 1.383617  | 1.312004  | -1.391811 |
| H | 2.123944  | -0.652072 | -1.431264 |
| H | 1.508416  | -1.495077 | 1.445616  |
| H | -0.767058 | -1.893375 | 0.638098  |
| H | 2.430678  | 1.863253  | -0.010391 |
| H | 3.215193  | -0.496127 | 0.012737  |
| H | -2.506568 | 1.536910  | -0.292518 |
| H | -0.286482 | -1.353144 | -1.040729 |

### TS 2 F E chair

SCF Energy: -371.850534675

Num. Imaginary Frequencies: 1

Imaginary Frequency: -572.8072

|   |           |           |           |
|---|-----------|-----------|-----------|
| C | 0.096538  | -1.257270 | 0.465150  |
| C | -1.056864 | -1.340134 | -0.316878 |
| C | -2.185560 | -0.563747 | 0.032245  |
| C | -1.674521 | 1.118304  | -0.351815 |
| C | -0.482615 | 1.348055  | 0.386114  |
| C | 0.611444  | 0.532959  | 0.176297  |
| C | 1.866622  | 0.658083  | -0.190838 |
| F | 2.753820  | -0.367672 | -0.150446 |
| H | -0.959477 | -1.670901 | -1.344910 |
| H | -0.021081 | -1.195470 | 1.540662  |
| H | 0.967882  | -1.820044 | 0.156914  |
| H | -0.553421 | 1.860301  | 1.340134  |
| H | -2.527629 | 1.728413  | -0.072340 |
| H | -1.572933 | 1.035843  | -1.427787 |
| H | -2.415254 | -0.489847 | 1.089569  |
| H | -3.076106 | -0.683284 | -0.575340 |
| H | 2.323379  | 1.566540  | -0.554535 |

### TS 2 F Z boat

SCF Energy: -371.832142326

Num. Imaginary Frequencies: 1

Imaginary Frequency: -647.4482

|   |           |           |           |
|---|-----------|-----------|-----------|
| C | 0.614537  | -1.540438 | -0.139067 |
| C | 1.795595  | -1.001911 | 0.333527  |
| C | 2.377476  | 0.090951  | -0.316904 |
| C | 1.019345  | 1.559780  | -0.254535 |
| C | -0.041231 | 1.122336  | 0.547810  |
| C | -0.741278 | -0.009008 | 0.223338  |
| C | -1.918320 | -0.519095 | -0.030909 |
| F | -3.016910 | 0.266442  | -0.185576 |
| H | -2.154583 | -1.563783 | -0.168733 |
| H | -0.036732 | 1.406210  | 1.597132  |
| H | 0.868332  | 1.530825  | -1.325079 |
| H | 2.386358  | 0.077218  | -1.398969 |
| H | 2.040177  | -1.161737 | 1.378640  |
| H | 0.136905  | -2.352579 | 0.393691  |
| H | 1.599691  | 2.404703  | 0.092268  |
| H | 3.252740  | 0.548345  | 0.126067  |
| H | 0.422560  | -1.502879 | -1.204395 |

### TS 2 F Z chair

SCF Energy: -371.849893739

Num. Imaginary Frequencies: 1

Imaginary Frequency: -561.0557

|   |           |           |           |
|---|-----------|-----------|-----------|
| C | 0.534952  | 1.498372  | 0.385653  |
| C | 1.559227  | 1.048210  | -0.445606 |
| C | 2.297852  | -0.097347 | -0.064702 |
| C | 1.130255  | -1.447267 | -0.258413 |
| C | 0.004736  | -1.116034 | 0.544849  |
| C | -0.684650 | 0.047380  | 0.281909  |
| C | -1.878950 | 0.488385  | -0.037226 |
| F | -2.893238 | -0.370321 | -0.320354 |
| H | 1.526859  | 1.314055  | -1.496242 |
| H | 0.695339  | 1.466898  | 1.456636  |
| H | -0.058875 | 2.344300  | 0.060142  |
| H | -0.054517 | -1.521647 | 1.549891  |
| H | 1.685836  | -2.327345 | 0.049447  |
| H | 0.986209  | -1.416947 | -1.332156 |
| H | 2.559498  | -0.176439 | 0.984885  |
| H | 3.112897  | -0.397679 | -0.714381 |
| H | -2.194641 | 1.517487  | -0.113804 |

### TS 2 H boat

SCF Energy: -272.581930680

Num. Imaginary Frequencies: 1

Imaginary Frequency: -678.7790

## 2 CARTESIAN COORDINATES

|   |           |           |           |
|---|-----------|-----------|-----------|
| C | -0.065508 | -1.489630 | -0.086653 |
| C | 1.187154  | -1.131991 | 0.378436  |
| C | 1.937058  | -0.170472 | -0.297397 |
| C | 0.783906  | 1.510268  | -0.250086 |
| C | -0.360533 | 1.216676  | 0.495339  |
| C | -1.224042 | 0.217723  | 0.122810  |
| C | -2.450625 | -0.109247 | -0.217614 |
| H | -0.341900 | 1.450436  | 1.557358  |
| H | 0.688846  | 1.520084  | -1.327501 |
| H | 1.925452  | -0.193157 | -1.379201 |
| H | 1.403498  | -1.299665 | 1.428842  |
| H | -0.672385 | -2.191734 | 0.470155  |
| H | 1.470813  | 2.245466  | 0.148015  |
| H | 2.873139  | 0.161775  | 0.132444  |
| H | -2.753276 | -1.138400 | -0.363057 |
| H | -3.199701 | 0.657056  | -0.380029 |
| H | -0.238949 | -1.471822 | -1.156040 |

### TS 2 H chair

SCF Energy: -272.598837466

Num. Imaginary Frequencies: 1

Imaginary Frequency: -604.9913

|   |           |           |           |
|---|-----------|-----------|-----------|
| C | 0.255085  | -1.370015 | 0.409644  |
| C | -0.920084 | -1.229826 | -0.334632 |
| C | -1.863809 | -0.259679 | 0.063125  |
| C | -1.018182 | 1.306900  | -0.293990 |
| C | 0.226771  | 1.261643  | 0.383943  |
| C | 1.133289  | 0.256247  | 0.096873  |
| H | -0.917692 | -1.553507 | -1.369619 |
| H | 0.175832  | -1.307751 | 1.489192  |
| H | 0.989062  | -2.092159 | 0.073901  |
| H | 0.296998  | 1.722221  | 1.364610  |
| H | -1.715325 | 2.065026  | 0.048915  |
| H | -0.989447 | 1.244693  | -1.375745 |
| H | -2.044888 | -0.162596 | 1.128010  |
| H | -2.773345 | -0.176505 | -0.521713 |
| C | 2.379622  | 0.075106  | -0.305440 |
| H | 2.975515  | 0.918220  | -0.631511 |
| H | 2.847138  | -0.899896 | -0.323173 |

### TS 2 NH2 E boat

SCF Energy: -327.943561703

Num. Imaginary Frequencies: 1

Imaginary Frequency: -668.9221

|   |           |           |           |
|---|-----------|-----------|-----------|
| C | -0.005498 | -1.370273 | 0.070041  |
| C | 1.338049  | -1.311046 | 0.390603  |
| C | 2.227671  | -0.588048 | -0.407027 |
| C | 1.584350  | 1.311876  | -0.324167 |
| C | 0.455296  | 1.355822  | 0.505072  |
| C | -0.655081 | 0.601949  | 0.220052  |
| C | -1.947252 | 0.647119  | -0.055334 |
| H | 0.617944  | 1.631536  | 1.545904  |
| H | 1.411184  | 1.342187  | -1.391785 |
| H | 2.095657  | -0.650715 | -1.479469 |
| H | 1.613246  | -1.483834 | 1.426277  |
| H | -0.680121 | -1.882999 | 0.745005  |
| H | 2.470076  | 1.844227  | -0.000674 |
| H | 3.260807  | -0.510423 | -0.093237 |
| N | -2.858093 | -0.409097 | -0.127641 |
| H | -2.400001 | 1.619714  | -0.218327 |
| H | -0.290309 | -1.379962 | -0.977125 |
| H | -3.623809 | -0.234102 | -0.759911 |
| H | -2.453231 | -1.316347 | -0.298623 |

### TS 2 NH2 E chair

SCF Energy: -327.958729355

Num. Imaginary Frequencies: 1

Imaginary Frequency: -601.1082

|   |           |           |           |
|---|-----------|-----------|-----------|
| C | 0.064916  | -1.251478 | 0.373718  |
| C | -1.143846 | -1.339228 | -0.322735 |
| C | -2.243079 | -0.558309 | 0.092797  |
| C | -1.720900 | 1.125668  | -0.330405 |
| C | -0.499791 | 1.342681  | 0.359017  |
| C | 0.598717  | 0.537706  | 0.113557  |
| C | 1.887986  | 0.656345  | -0.178171 |
| H | -1.112842 | -1.662677 | -1.357561 |
| H | 0.030009  | -1.231165 | 1.457477  |
| H | 0.897522  | -1.821184 | -0.021735 |
| H | -0.554750 | 1.844050  | 1.322191  |
| H | -2.558844 | 1.740508  | -0.016141 |
| H | -1.670522 | 1.032241  | -1.409111 |
| H | -2.406195 | -0.470405 | 1.161434  |
| H | -3.170882 | -0.668242 | -0.458530 |
| H | 2.248955  | 1.617679  | -0.524691 |
| N | 2.865813  | -0.351035 | -0.171293 |
| H | 3.803109  | 0.020117  | -0.175413 |
| H | 2.769740  | -1.023994 | 0.574466  |

### TS 2 NH2 Z boat

SCF Energy: -327.943285400

Num. Imaginary Frequencies: 1

Imaginary Frequency: -670.8535

|   |           |           |           |
|---|-----------|-----------|-----------|
| C | -0.633607 | 1.512072  | -0.183847 |
| C | -1.808543 | 1.010954  | 0.345613  |
| C | -2.422170 | -0.099396 | -0.254103 |
| C | -1.075169 | -1.528674 | -0.269509 |
| C | 0.025423  | -1.118241 | 0.503486  |
| C | 0.716570  | 0.026056  | 0.188132  |
| C | 1.925723  | 0.526214  | -0.003460 |
| H | 2.081723  | 1.595830  | -0.080049 |
| H | 0.045085  | -1.435694 | 1.545247  |
| H | -0.948826 | -1.491003 | -1.343796 |
| H | -2.515571 | -0.085634 | -1.332696 |
| H | -1.997535 | 1.187544  | 1.399967  |
| H | -0.128305 | 2.335131  | 0.305787  |
| H | -1.637496 | -2.387783 | 0.074871  |
| H | -3.276104 | -0.538748 | 0.246745  |
| N | 3.080011  | -0.233543 | -0.242304 |
| H | -0.492670 | 1.456023  | -1.256642 |
| H | 3.926696  | 0.208469  | 0.083714  |
| H | 3.013573  | -1.183238 | 0.095111  |

**TS 2 NH2 Z chair**

SCF Energy: -327.960702009

Num. Imaginary Frequencies: 1

Imaginary Frequency: -576.0270

|   |           |           |           |
|---|-----------|-----------|-----------|
| C | 0.592101  | 1.489278  | 0.381146  |
| C | 1.615572  | 1.035386  | -0.448597 |
| C | 2.331429  | -0.128346 | -0.077265 |
| C | 1.132027  | -1.452281 | -0.260576 |
| C | 0.013996  | -1.095731 | 0.545434  |
| C | -0.668759 | 0.072275  | 0.266844  |
| C | -1.881037 | 0.515086  | -0.028982 |
| H | 1.585471  | 1.305426  | -1.498624 |
| H | 0.753093  | 1.453591  | 1.452298  |
| H | 0.009173  | 2.344295  | 0.059731  |
| H | -0.009144 | -1.470609 | 1.566366  |
| H | 1.678278  | -2.337952 | 0.049962  |
| H | 0.981741  | -1.428551 | -1.334278 |
| H | 2.597172  | -0.216219 | 0.970991  |
| H | 3.139680  | -0.440576 | -0.730289 |
| N | -3.008838 | -0.306436 | -0.202525 |
| H | -2.094031 | 1.574470  | -0.097627 |
| H | -3.629025 | 0.021659  | -0.929664 |
| H | -2.762525 | -1.274487 | -0.359216 |

**TS 2 NO2 E boat**

SCF Energy: -477.099834721

Num. Imaginary Frequencies: 1

Imaginary Frequency: -650.7281

|   |           |           |           |
|---|-----------|-----------|-----------|
| C | -0.634393 | -1.351272 | 0.053741  |
| C | -1.984142 | -1.337673 | -0.248713 |
| C | -2.875853 | -0.573250 | 0.502390  |
| C | -2.277244 | 1.317165  | 0.262628  |
| C | -1.169440 | 1.331118  | -0.588777 |
| C | -0.037785 | 0.600375  | -0.329485 |
| C | 1.225797  | 0.910296  | -0.091613 |
| N | 2.323806  | -0.031020 | 0.041560  |
| H | -1.310115 | 1.612123  | -1.629565 |
| H | -2.078159 | 1.407202  | 1.321471  |
| H | -2.727021 | -0.545800 | 1.573423  |
| H | -2.275694 | -1.614209 | -1.256564 |
| H | 0.045506  | -1.911089 | -0.566573 |
| H | -3.165217 | 1.836579  | -0.071967 |
| H | -3.912088 | -0.527377 | 0.193997  |
| H | 1.578508  | 1.915555  | 0.075078  |
| H | -0.329530 | -1.238772 | 1.089832  |
| O | 3.358190  | 0.428448  | 0.492098  |
| O | 2.195002  | -1.190652 | -0.289733 |

**TS 2 NO2 E chair**

SCF Energy: -477.138341653

Num. Imaginary Frequencies: 1

Imaginary Frequency: -371.4507

|   |           |           |           |
|---|-----------|-----------|-----------|
| C | 0.474838  | 1.352871  | -0.068394 |
| C | 1.669264  | 1.095784  | -0.682747 |
| C | 2.798208  | 0.575516  | 0.104220  |
| C | 2.586702  | -0.965693 | 0.192980  |
| C | 1.142767  | -1.295906 | 0.295941  |
| C | 0.102816  | -0.539516 | -0.036330 |
| C | -1.187786 | -0.763911 | -0.458217 |
| N | -2.255794 | -0.055983 | 0.058283  |
| H | 1.736132  | 1.108799  | -1.764768 |
| H | 0.440908  | 1.544505  | 0.994943  |
| H | -0.355661 | 1.741898  | -0.637568 |
| H | 0.886663  | -2.286214 | 0.659095  |
| H | 3.150404  | -1.395009 | 1.019790  |
| H | 2.974553  | -1.410486 | -0.725174 |
| H | 2.784578  | 0.990439  | 1.110160  |
| H | 3.760424  | 0.778368  | -0.358288 |
| H | -1.440790 | -1.430330 | -1.264370 |
| O | -3.380238 | -0.247103 | -0.424866 |
| O | -2.078200 | 0.746483  | 0.984052  |

**TS 2 NO2 Z boat**

SCF Energy: -477.105647728

Num. Imaginary Frequencies: 1

Imaginary Frequency: -661.4761

|   |           |           |           |
|---|-----------|-----------|-----------|
| C | 1.363340  | -1.516748 | -0.194905 |
| C | 2.541497  | -0.979191 | 0.302251  |
| C | 3.082295  | 0.172778  | -0.286124 |
| C | 1.672788  | 1.500818  | -0.279742 |
| C | 0.586939  | 1.042381  | 0.490841  |
| C | -0.001266 | -0.164435 | 0.255185  |
| C | -1.182296 | -0.751047 | 0.144467  |
| N | -2.399427 | 0.016617  | -0.041392 |
| H | -1.377898 | -1.809830 | 0.126554  |
| H | 0.439181  | 1.441859  | 1.490309  |
| H | 1.545268  | 1.452107  | -1.352568 |
| H | 3.164445  | 0.176654  | -1.365076 |
| H | 2.793975  | -1.194725 | 1.335050  |
| H | 0.937821  | -2.396379 | 0.270639  |
| H | 2.152536  | 2.412212  | 0.053307  |
| H | 3.918097  | 0.646711  | 0.212955  |
| H | 1.178483  | -1.428500 | -1.261364 |
| O | -3.415717 | -0.634217 | -0.224283 |
| O | -2.376245 | 1.228747  | -0.002204 |

**TS 2 NO2 Z chair**

SCF Energy: -477.136495552

Num. Imaginary Frequencies: 1

Imaginary Frequency: -380.5027

|   |           |           |           |
|---|-----------|-----------|-----------|
| C | -1.197984 | -1.686413 | 0.121266  |
| C | -1.914988 | -0.916742 | -0.753914 |
| C | -2.863010 | 0.081368  | -0.241040 |
| C | -2.019574 | 1.354490  | 0.099135  |
| C | -0.714822 | 0.970387  | 0.689230  |
| C | -0.055816 | -0.170382 | 0.519156  |
| C | 1.229781  | -0.629326 | 0.514356  |
| N | 2.247425  | 0.099307  | -0.106855 |
| H | -1.655184 | -0.912011 | -1.806169 |
| H | -1.575546 | -1.863973 | 1.119711  |
| H | -0.493931 | -2.412772 | -0.255474 |
| H | -0.207759 | 1.699220  | 1.313802  |
| H | -2.570326 | 2.025191  | 0.756496  |
| H | -1.844006 | 1.887385  | -0.836590 |
| H | -3.341508 | -0.272307 | 0.670040  |
| H | -3.624118 | 0.350271  | -0.968568 |
| H | 1.552615  | -1.586635 | 0.882212  |
| O | 3.377225  | -0.403809 | -0.114274 |
| O | 2.028558  | 1.200082  | -0.612802 |

**TS 2 OH E boat**

SCF Energy: -347.815388698

Num. Imaginary Frequencies: 1

Imaginary Frequency: -666.8307

|   |           |           |           |
|---|-----------|-----------|-----------|
| C | -0.033780 | -1.366865 | 0.026945  |
| C | 1.297539  | -1.317348 | 0.395585  |
| C | 2.218276  | -0.591239 | -0.366275 |
| C | 1.580238  | 1.301991  | -0.324910 |
| C | 0.445187  | 1.362835  | 0.496128  |
| C | -0.655206 | 0.593885  | 0.217880  |
| C | -1.939513 | 0.628617  | -0.065850 |
| O | -2.720574 | -0.491452 | -0.164934 |
| H | 0.592922  | 1.661176  | 1.531903  |
| H | 1.411281  | 1.314309  | -1.393499 |
| H | 2.132768  | -0.660832 | -1.442979 |
| H | 1.535944  | -1.497042 | 1.439345  |
| H | -0.751680 | -1.873622 | 0.657096  |
| H | 2.461162  | 1.846073  | -0.008304 |
| H | 3.237944  | -0.515705 | -0.010328 |
| H | -2.442790 | 1.569358  | -0.258905 |
| H | -0.286704 | -1.347141 | -1.027038 |
| H | -3.602711 | -0.236215 | -0.444844 |

**TS 2 OH E chair**

SCF Energy: -347.831649615

Num. Imaginary Frequencies: 1

Imaginary Frequency: -591.3124

|   |           |           |           |
|---|-----------|-----------|-----------|
| C | 0.064709  | -1.248216 | 0.494837  |
| C | -1.068384 | -1.346221 | -0.313899 |
| C | -2.206765 | -0.568876 | -0.003275 |
| C | -1.679370 | 1.123977  | -0.366929 |
| C | -0.505040 | 1.346116  | 0.399399  |
| C | 0.599427  | 0.543497  | 0.189037  |
| C | 1.866432  | 0.644229  | -0.167326 |
| O | 2.755788  | -0.399277 | -0.132167 |
| H | -0.941369 | -1.682009 | -1.337406 |
| H | -0.080874 | -1.170801 | 1.566107  |
| H | 0.948959  | -1.806576 | 0.216956  |
| H | -0.615718 | 1.815636  | 1.373011  |
| H | -2.543458 | 1.725246  | -0.101380 |
| H | -1.553059 | 1.047497  | -1.441028 |
| H | -2.468575 | -0.489186 | 1.046335  |
| H | -3.079086 | -0.688389 | -0.637013 |
| H | 2.272253  | 1.590330  | -0.504273 |
| H | 3.588564  | -0.114567 | -0.515040 |

**TS 2 OH Z boat**

SCF Energy: -347.813522290

Num. Imaginary Frequencies: 1

Imaginary Frequency: -661.8626

|   |           |           |           |
|---|-----------|-----------|-----------|
| C | 0.604924  | -1.524253 | -0.158563 |
| C | 1.791770  | -1.022042 | 0.340441  |
| C | 2.406593  | 0.068659  | -0.288049 |
| C | 1.076436  | 1.538254  | -0.267283 |
| C | -0.011544 | 1.132587  | 0.520551  |
| C | -0.726342 | 0.007058  | 0.201138  |
| C | -1.928646 | -0.485005 | -0.010786 |
| O | -3.030069 | 0.323964  | -0.145545 |
| H | -2.116300 | -1.547040 | -0.111426 |
| H | -0.014045 | 1.436411  | 1.565471  |
| H | 0.937412  | 1.506202  | -1.339826 |
| H | 2.457057  | 0.050972  | -1.369178 |
| H | 2.005375  | -1.189454 | 1.391417  |
| H | 0.100787  | -2.332224 | 0.356263  |
| H | 1.661189  | 2.381635  | 0.077445  |
| H | 3.279376  | 0.504315  | 0.181866  |
| H | 0.439603  | -1.479526 | -1.228157 |
| H | -3.789053 | -0.214554 | -0.384206 |

**TS 2 OH Z chair**

SCF Energy: -347.830700929

Num. Imaginary Frequencies: 1

Imaginary Frequency: -575.5888

|   |           |           |           |
|---|-----------|-----------|-----------|
| C | 0.552584  | 1.488689  | 0.397894  |
| C | 1.574559  | 1.058498  | -0.445653 |
| C | 2.320126  | -0.089660 | -0.086224 |
| C | 1.149774  | -1.444806 | -0.268001 |
| C | 0.034827  | -1.117572 | 0.551446  |
| C | -0.674917 | 0.034236  | 0.285082  |
| C | -1.880624 | 0.464000  | -0.032665 |
| O | -2.912260 | -0.409746 | -0.282458 |
| H | 1.527923  | 1.333028  | -1.493770 |
| H | 0.722533  | 1.446107  | 1.467174  |
| H | -0.050995 | 2.333718  | 0.088281  |
| H | 0.020092  | -1.502274 | 1.567845  |
| H | 1.718684  | -2.319807 | 0.030873  |
| H | 0.989254  | -1.413692 | -1.339732 |
| H | 2.596784  | -0.177816 | 0.959018  |
| H | 3.127684  | -0.382486 | -0.748822 |
| H | -2.132285 | 1.514099  | -0.104625 |
| H | -3.679565 | 0.086772  | -0.577854 |

**TS 2 OMe E boat**

SCF Energy: -387.106752835

Num. Imaginary Frequencies: 1

Imaginary Frequency: -667.4095

|   |           |           |           |
|---|-----------|-----------|-----------|
| C | -0.430624 | -1.351463 | -0.092412 |
| C | -1.785184 | -1.337603 | -0.368057 |
| C | -2.671219 | -0.646545 | 0.464482  |
| C | -2.091241 | 1.262441  | 0.404900  |
| C | -1.017194 | 1.366926  | -0.490937 |
| C | 0.119827  | 0.625013  | -0.301645 |
| C | 1.422677  | 0.694794  | -0.120130 |
| O | 2.244277  | -0.392395 | -0.112244 |
| H | -1.243473 | 1.676336  | -1.509172 |
| H | -1.849138 | 1.267668  | 1.459382  |
| H | -2.510513 | -0.726939 | 1.531830  |
| H | -2.089586 | -1.511912 | -1.395438 |
| H | 0.256780  | -1.829167 | -0.776777 |
| H | -3.005969 | 1.786010  | 0.157041  |
| H | -3.714659 | -0.596673 | 0.180050  |
| H | 1.913905  | 1.649167  | 0.048662  |
| H | -0.105948 | -1.336093 | 0.941838  |
| C | 3.564762  | -0.120890 | 0.328003  |
| H | 4.116339  | -1.054239 | 0.266258  |
| H | 4.041673  | 0.624762  | -0.311088 |
| H | 3.565544  | 0.234207  | 1.360146  |

**TS 2 OMe E chair**

SCF Energy: -387.123174616

Num. Imaginary Frequencies: 1

Imaginary Frequency: -583.5143

|   |           |           |           |
|---|-----------|-----------|-----------|
| C | 0.443831  | -1.231979 | -0.559186 |
| C | 1.512493  | -1.361859 | 0.329358  |
| C | 2.684561  | -0.601337 | 0.114270  |
| C | 2.161369  | 1.087372  | 0.470362  |
| C | 1.052424  | 1.348732  | -0.378536 |
| C | -0.077798 | 0.560536  | -0.282735 |
| C | -1.376293 | 0.692196  | -0.071837 |
| H | 1.304244  | -1.706535 | 1.336445  |
| H | 0.669782  | -1.152556 | -1.616432 |
| H | -0.470270 | -1.772735 | -0.352063 |
| H | 1.242281  | 1.851927  | -1.322459 |
| H | 3.050602  | 1.682115  | 0.284989  |
| H | 1.952532  | 0.994090  | 1.530148  |
| H | 3.023346  | -0.512491 | -0.912367 |
| H | 3.506614  | -0.748558 | 0.806710  |
| H | -1.793638 | 1.642505  | 0.247400  |
| O | -2.289611 | -0.305238 | -0.260816 |
| C | -3.512357 | -0.102449 | 0.426848  |
| H | -4.167794 | -0.926177 | 0.159654  |
| H | -3.355506 | -0.097225 | 1.507267  |
| H | -3.974684 | 0.840262  | 0.125974  |

**TS 2 OMe Z boat**

SCF Energy: -387.105035123

Num. Imaginary Frequencies: 1

Imaginary Frequency: -663.2344

|   |           |           |           |
|---|-----------|-----------|-----------|
| C | -1.036931 | -1.523407 | 0.113724  |
| C | -2.278662 | -1.067550 | -0.287348 |
| C | -2.894619 | -0.019374 | 0.408620  |
| C | -1.635511 | 1.507868  | 0.328576  |
| C | -0.588467 | 1.169834  | -0.542628 |
| C | 0.194115  | 0.070080  | -0.303778 |
| C | 1.431117  | -0.374572 | -0.208325 |
| O | 2.507663  | 0.467136  | -0.171491 |
| H | 1.672034  | -1.431785 | -0.149643 |
| H | -0.669409 | 1.499209  | -1.576540 |
| H | -1.419658 | 1.459833  | 1.387667  |
| H | -2.866833 | -0.061740 | 1.489896  |
| H | -2.559856 | -1.223447 | -1.324087 |
| H | -0.536691 | -2.297954 | -0.453526 |
| H | -2.278142 | 2.332115  | 0.046285  |
| H | -3.817366 | 0.385123  | 0.012011  |
| H | -0.797463 | -1.492599 | 1.169772  |
| C | 3.681996  | -0.118465 | 0.368025  |
| H | 4.474860  | 0.617807  | 0.274166  |
| H | 3.542658  | -0.371365 | 1.420775  |
| H | 3.956334  | -1.018766 | -0.186041 |

**TS 2 OMe Z chair**

SCF Energy: -387.122296741

Num. Imaginary Frequencies: 1

Imaginary Frequency: -570.8918

|   |           |           |           |
|---|-----------|-----------|-----------|
| C | 1.043563  | 1.478014  | 0.432578  |
| C | 1.994466  | 1.093225  | -0.510975 |
| C | 2.803826  | -0.036972 | -0.244121 |
| C | 1.661869  | -1.420494 | -0.345458 |
| C | 0.616987  | -1.144073 | 0.579118  |
| C | -0.143393 | -0.005986 | 0.414399  |
| C | -1.392202 | 0.396395  | 0.264137  |
| H | 1.841842  | 1.382798  | -1.544830 |
| H | 1.316851  | 1.427924  | 1.479971  |
| H | 0.389873  | 2.309181  | 0.195661  |
| H | 0.695637  | -1.562348 | 1.578956  |
| H | 2.277219  | -2.285734 | -0.118834 |
| H | 1.403270  | -1.374728 | -1.397257 |
| H | 3.179016  | -0.133431 | 0.769162  |
| H | 3.554785  | -0.293242 | -0.983932 |
| O | -2.428099 | -0.490365 | 0.143867  |
| H | -1.681030 | 1.442358  | 0.256263  |
| C | -3.572965 | 0.051595  | -0.493440 |
| H | -4.343542 | -0.713487 | -0.467469 |
| H | -3.927301 | 0.939832  | 0.034695  |
| H | -3.354738 | 0.313572  | -1.530742 |

**TS 2 tBut E boat**

SCF Energy: -429.811001489

Num. Imaginary Frequencies: 1

Imaginary Frequency: -670.9043

## 2 CARTESIAN COORDINATES

---

|   |           |           |           |
|---|-----------|-----------|-----------|
| C | 1.036835  | -1.274383 | 0.002324  |
| C | 2.360589  | -1.296416 | 0.401412  |
| C | 3.328364  | -0.626534 | -0.345256 |
| C | 2.717160  | 1.311524  | -0.348661 |
| C | 1.592637  | 1.405271  | 0.471299  |
| C | 0.423973  | 0.724148  | 0.214551  |
| C | -0.862657 | 0.931773  | -0.000903 |
| H | 1.758096  | 1.677598  | 1.511870  |
| H | 2.554372  | 1.302096  | -1.418129 |
| H | 3.259150  | -0.682616 | -1.423378 |
| H | 2.573103  | -1.505319 | 1.445080  |
| H | 0.292114  | -1.786045 | 0.593901  |
| H | 3.616822  | 1.824090  | -0.033924 |
| H | 4.340992  | -0.576641 | 0.034009  |
| C | -2.074488 | 0.008073  | -0.045094 |
| H | -1.115265 | 1.981328  | -0.144776 |
| H | 0.826899  | -1.210257 | -1.058847 |
| C | -3.298745 | 0.887656  | -0.329795 |
| C | -1.991022 | -1.045730 | -1.157185 |
| C | -2.282784 | -0.672702 | 1.312915  |
| H | -3.168636 | -1.310548 | 1.278580  |
| H | -1.430307 | -1.289176 | 1.592944  |
| H | -2.429331 | 0.073046  | 2.095564  |
| H | -2.967724 | -1.518368 | -1.278984 |
| H | -1.716175 | -0.586191 | -2.107859 |
| H | -1.273774 | -1.831033 | -0.934610 |
| H | -4.207769 | 0.284981  | -0.327893 |
| H | -3.402186 | 1.666507  | 0.427623  |
| H | -3.209559 | 1.370467  | -1.304817 |

### TS 2 tBut E chair

SCF Energy: -429.828030261

Num. Imaginary Frequencies: 1

Imaginary Frequency: -608.0608

|   |           |           |           |
|---|-----------|-----------|-----------|
| C | 0.989274  | -1.136989 | -0.556404 |
| C | 2.085345  | -1.317324 | 0.292102  |
| C | 3.271250  | -0.597310 | 0.041143  |
| C | 2.793877  | 1.114487  | 0.407814  |
| C | 1.646677  | 1.395511  | -0.374103 |
| C | 0.482542  | 0.657659  | -0.215912 |
| C | -0.786056 | 0.891445  | 0.096176  |
| C | -2.036426 | 0.022816  | 0.059620  |
| H | 1.901367  | -1.677723 | 1.298588  |
| H | 1.178543  | -1.044593 | -1.619943 |
| H | 0.095983  | -1.697979 | -0.332353 |
| H | 1.787027  | 1.897939  | -1.326816 |
| H | 3.683240  | 1.688175  | 0.165937  |
| H | 2.647072  | 1.026277  | 1.478334  |
| H | 3.578455  | -0.508282 | -0.995080 |
| H | 4.109484  | -0.763186 | 0.709204  |
| H | -0.975292 | 1.905457  | 0.440923  |
| C | -3.237032 | 0.954140  | 0.277076  |
| C | -2.235304 | -0.667619 | -1.295676 |
| C | -2.033934 | -1.001172 | 1.203999  |
| H | -3.183979 | -1.208558 | -1.296313 |
| H | -2.268586 | 0.074846  | -2.094429 |
| H | -1.447474 | -1.377790 | -1.533759 |
| H | -2.968037 | -1.566937 | 1.198344  |
| H | -1.210819 | -1.710053 | 1.132909  |
| H | -1.951582 | -0.491909 | 2.165432  |
| H | -4.167135 | 0.384157  | 0.266316  |
| H | -3.160917 | 1.467289  | 1.237231  |
| H | -3.288636 | 1.709007  | -0.509533 |

### TS 2 tBut Z boat

SCF Energy: -429.819420060

Num. Imaginary Frequencies: 1

Imaginary Frequency: -659.5983



## 2 CARTESIAN COORDINATES

|   |           |           |           |
|---|-----------|-----------|-----------|
| C | -1.848857 | 1.579036  | -0.085335 |
| C | -3.021672 | 0.941923  | 0.278053  |
| C | -3.455210 | -0.181499 | -0.425557 |
| C | -1.953879 | -1.540812 | -0.210262 |
| C | -0.990582 | -0.975425 | 0.629512  |
| C | -0.352366 | 0.195844  | 0.301621  |
| C | 0.799817  | 0.782841  | 0.061442  |
| H | -1.057086 | -1.200679 | 1.692199  |
| H | -1.748449 | -1.540379 | -1.272581 |
| H | -3.345989 | -0.172348 | -1.502170 |
| H | -3.369184 | 1.067065  | 1.298849  |
| H | -1.480241 | 2.412930  | 0.497777  |
| H | -2.486770 | -2.413403 | 0.144449  |
| H | -4.325215 | -0.718585 | -0.070338 |
| H | 0.831181  | 1.857878  | -0.093135 |
| C | 2.131397  | 0.042308  | -0.050626 |
| H | -1.574104 | 1.587635  | -1.133112 |
| C | 3.238439  | 1.066135  | -0.305196 |
| C | 2.426594  | -0.714707 | 1.246446  |
| C | 2.076571  | -0.951156 | -1.214964 |
| H | 3.379884  | -1.241572 | 1.167532  |
| H | 2.482513  | -0.027893 | 2.092470  |
| H | 1.645209  | -1.448016 | 1.449922  |
| H | 3.025213  | -1.485014 | -1.302809 |
| H | 1.281405  | -1.680548 | -1.054668 |
| H | 1.884508  | -0.434407 | -2.156631 |
| H | 4.205468  | 0.568423  | -0.393036 |
| H | 3.052401  | 1.616579  | -1.229269 |
| H | 3.297747  | 1.785404  | 0.513744  |

### TS 2 tBut Z chair

SCF Energy: -429.836093635  
Num. Imaginary Frequencies: 1  
Imaginary Frequency: -596.3446

|   |           |           |           |
|---|-----------|-----------|-----------|
| C | -1.790503 | 1.527868  | -0.413974 |
| C | -2.712011 | 0.993930  | 0.491594  |
| C | -3.360280 | -0.215071 | 0.166307  |
| C | -2.011120 | -1.444467 | 0.234823  |
| C | -0.994674 | -0.970128 | -0.629965 |
| C | -0.402726 | 0.258316  | -0.385340 |
| C | 0.775788  | 0.807345  | -0.143793 |
| H | -2.622605 | 1.265160  | 1.537878  |
| H | -2.036238 | 1.476947  | -1.468760 |
| H | -1.269523 | 2.436443  | -0.138144 |
| H | -0.981364 | -1.332201 | -1.654407 |
| H | -2.494339 | -2.371151 | -0.058295 |
| H | -1.802447 | -1.412098 | 1.298329  |
| H | -3.690906 | -0.332880 | -0.859855 |
| H | -4.074119 | -0.610609 | 0.880624  |
| C | 2.065573  | 0.022207  | 0.074469  |
| H | 0.863556  | 1.888272  | -0.098840 |
| C | 3.182389  | 1.010779  | 0.414765  |
| C | 1.897553  | -0.967875 | 1.230288  |
| C | 2.439570  | -0.744165 | -1.197774 |
| H | 3.374513  | -1.289574 | -1.051111 |
| H | 1.659364  | -1.461597 | -1.455274 |
| H | 2.569256  | -0.060851 | -2.038723 |
| H | 4.122970  | 0.482969  | 0.580202  |
| H | 3.329930  | 1.724284  | -0.398231 |
| H | 2.941368  | 1.571389  | 1.319886  |
| H | 2.820736  | -1.531241 | 1.381723  |
| H | 1.659242  | -0.442767 | 2.156724  |
| H | 1.093252  | -1.672933 | 1.017877  |

### TS 5 BH2 E

SCF Energy: -411.355072299  
Num. Imaginary Frequencies: 1  
Imaginary Frequency: -529.7631

|   |           |           |           |
|---|-----------|-----------|-----------|
| O | -0.837802 | -0.848981 | -1.323663 |
| C | -0.163040 | -1.089338 | -0.241398 |
| C | -0.978810 | -1.226127 | 0.991000  |
| C | -1.651892 | 0.231434  | 1.241562  |
| C | -1.156280 | 1.117350  | 0.154593  |
| C | -1.641900 | 0.781833  | -1.124466 |
| C | 0.179686  | 1.467565  | 0.225608  |
| C | 1.084270  | -0.524556 | -0.112447 |
| C | 2.405796  | -0.599821 | -0.127833 |
| H | -1.225500 | 1.281870  | -1.989263 |
| H | 0.655946  | 1.603473  | 1.188211  |
| H | -2.667552 | 0.454430  | -1.230101 |
| B | 3.356119  | 0.570339  | 0.172395  |
| H | 2.812732  | -1.579252 | -0.373754 |
| H | 0.659759  | 1.952888  | -0.615491 |
| H | -0.393075 | -1.519369 | 1.858526  |
| H | -1.778241 | -1.943111 | 0.820591  |
| H | -1.341437 | 0.573801  | 2.225661  |
| H | -2.733075 | 0.118661  | 1.226787  |
| H | 4.532183  | 0.395376  | 0.156001  |
| H | 2.933112  | 1.651340  | 0.420456  |

**TS 5 BH2 Z**

SCF Energy: -411.357444029

Num. Imaginary Frequencies: 1

Imaginary Frequency: -532.0026

|   |           |           |           |
|---|-----------|-----------|-----------|
| O | 0.428688  | -0.688860 | 1.413335  |
| C | -0.205143 | -0.829979 | 0.282673  |
| C | 0.604286  | -1.415164 | -0.812330 |
| C | 1.780191  | -0.327192 | -1.120877 |
| C | 1.555980  | 0.811501  | -0.193177 |
| C | 1.764257  | 0.484407  | 1.166640  |
| C | 0.442660  | 1.588051  | -0.458611 |
| C | -1.114701 | 0.138406  | -0.064413 |
| C | -2.341504 | 0.599757  | -0.232147 |
| H | 1.502233  | 1.215456  | 1.920812  |
| H | 0.125943  | 1.756545  | -1.481084 |
| H | 2.593557  | -0.160420 | 1.426151  |
| H | -2.460682 | 1.606883  | -0.620738 |
| B | -3.546631 | -0.291114 | 0.116464  |
| H | 0.100279  | 2.313196  | 0.270636  |
| H | 0.029437  | -1.604685 | -1.715169 |
| H | 1.078429  | -2.331727 | -0.470333 |
| H | 1.690559  | -0.034449 | -2.164111 |
| H | 2.740853  | -0.811392 | -0.964806 |
| H | -4.658355 | 0.100021  | -0.045665 |
| H | -3.354752 | -1.381705 | 0.548757  |

**TS 5 CHO E**

SCF Energy: -499.254446922

Num. Imaginary Frequencies: 1

Imaginary Frequency: -525.8087

|   |           |           |           |
|---|-----------|-----------|-----------|
| O | -1.310874 | -0.844883 | -1.313952 |
| C | -0.641259 | -1.102460 | -0.236300 |
| C | -1.449910 | -1.205785 | 1.001480  |
| C | -2.046830 | 0.287508  | 1.254266  |
| C | -1.535048 | 1.145584  | 0.153940  |
| C | -2.047703 | 0.820929  | -1.117367 |
| C | -0.192014 | 1.470401  | 0.208423  |
| C | 0.623516  | -0.576734 | -0.119484 |
| C | 1.931017  | -0.736158 | -0.161547 |
| H | -1.622097 | 1.297153  | -1.990862 |
| H | 0.288089  | 1.610098  | 1.169118  |
| H | -3.084873 | 0.528095  | -1.208483 |
| C | 2.882880  | 0.350203  | 0.102780  |
| H | 2.363418  | -1.702444 | -0.402384 |
| H | 0.284382  | 1.941780  | -0.643150 |
| H | -0.871677 | -1.523934 | 1.864789  |
| H | -2.286887 | -1.879890 | 0.838671  |
| H | -1.700781 | 0.619778  | 2.229665  |
| H | -3.131710 | 0.222241  | 1.260811  |
| O | 4.081539  | 0.199017  | 0.067058  |
| H | 2.448912  | 1.333123  | 0.339820  |

**TS 5 CHO Z**

SCF Energy: -499.256934013

Num. Imaginary Frequencies: 1

Imaginary Frequency: -522.8061

|   |           |           |           |
|---|-----------|-----------|-----------|
| O | 0.868925  | -0.688583 | 1.408507  |
| C | 0.235892  | -0.836024 | 0.276599  |
| C | 1.046310  | -1.422969 | -0.811799 |
| C | 2.209492  | -0.312165 | -1.124455 |
| C | 1.985370  | 0.817357  | -0.189348 |
| C | 2.183293  | 0.473086  | 1.172156  |
| C | 0.881579  | 1.608179  | -0.452022 |
| C | -0.652973 | 0.149227  | -0.077038 |
| C | -1.884948 | 0.583810  | -0.233773 |
| H | 1.925963  | 1.202829  | 1.929228  |
| H | 0.574997  | 1.792579  | -1.474771 |
| H | 3.017381  | -0.167680 | 1.426696  |
| H | -2.113272 | 1.572669  | -0.613051 |
| C | -3.016317 | -0.293501 | 0.115256  |
| H | 0.544766  | 2.329877  | 0.283075  |
| H | 0.476542  | -1.621622 | -1.715420 |
| H | 1.537872  | -2.328283 | -0.465829 |
| H | 2.104248  | -0.015658 | -2.164911 |
| H | 3.173569  | -0.792637 | -0.980141 |
| O | -4.173443 | 0.027697  | -0.006010 |
| H | -2.732103 | -1.286983 | 0.501696  |

**TS 5 CN E**

SCF Energy: -478.176010906

Num. Imaginary Frequencies: 1

Imaginary Frequency: -532.8264

|   |           |           |           |
|---|-----------|-----------|-----------|
| O | 1.327727  | 0.845334  | -1.240691 |
| C | 0.665871  | 1.143927  | -0.159944 |
| C | 1.443454  | 1.050126  | 1.093731  |
| C | 1.803248  | -0.539448 | 1.252422  |
| C | 1.212533  | -1.233108 | 0.081497  |
| C | 1.801751  | -0.867575 | -1.154269 |
| C | -0.164378 | -1.352462 | 0.078705  |
| C | -0.648938 | 0.757735  | -0.103693 |
| C | -1.932530 | 1.043311  | -0.154216 |
| H | 1.349047  | -1.230009 | -2.068180 |
| H | -0.701878 | -1.485362 | 1.010485  |
| H | 2.874957  | -0.737695 | -1.198655 |
| C | -2.933045 | 0.034135  | 0.023859  |
| H | -2.289496 | 2.049867  | -0.336447 |
| H | -0.680600 | -1.675977 | -0.818254 |
| H | 0.896133  | 1.391760  | 1.967861  |
| H | 2.379260  | 1.593325  | 0.993978  |
| H | 1.375104  | -0.877156 | 2.192578  |
| H | 2.885326  | -0.630962 | 1.292698  |
| N | -3.742496 | -0.768614 | 0.162986  |

**TS 5 CN Z**

SCF Energy: -478.175233260

Num. Imaginary Frequencies: 1

Imaginary Frequency: -526.8586

|   |           |           |           |
|---|-----------|-----------|-----------|
| O | 0.666835  | -0.758962 | 1.372583  |
| C | 0.060765  | -0.804568 | 0.219771  |
| C | 0.852886  | -1.399036 | -0.876892 |
| C | 2.102944  | -0.364315 | -1.105593 |
| C | 1.939623  | 0.731860  | -0.119584 |
| C | 2.073020  | 0.308441  | 1.227663  |
| C | 0.912577  | 1.622569  | -0.368459 |
| C | -0.744116 | 0.256862  | -0.105606 |
| C | -1.921700 | 0.816486  | -0.280308 |
| H | 1.849845  | 1.017659  | 2.014309  |
| H | 0.648803  | 1.878624  | -1.387820 |
| H | 2.846658  | -0.408243 | 1.469914  |
| H | -2.031498 | 1.839437  | -0.617373 |
| C | -3.131373 | 0.091571  | -0.025692 |
| H | 0.611383  | 2.330347  | 0.395098  |
| H | 0.294680  | -1.510168 | -1.802331 |
| H | 1.266396  | -2.353923 | -0.564001 |
| H | 2.047199  | -0.009971 | -2.131546 |
| H | 3.023822  | -0.923624 | -0.964102 |
| N | -4.108533 | -0.478238 | 0.173626  |

**TS 5 F E**

SCF Energy: -485.171689098

Num. Imaginary Frequencies: 1

Imaginary Frequency: -528.9916

|   |           |           |           |
|---|-----------|-----------|-----------|
| O | -0.932859 | -0.775762 | -1.352508 |
| C | -0.249990 | -1.094993 | -0.286676 |
| C | -1.074058 | -1.280348 | 0.925371  |
| C | -1.659314 | 0.216723  | 1.257190  |
| C | -1.148848 | 1.127832  | 0.203563  |
| C | -1.639352 | 0.824455  | -1.093230 |
| C | 0.193164  | 1.452535  | 0.277879  |
| C | 0.984924  | -0.523949 | -0.125458 |
| C | 2.285666  | -0.584352 | -0.146344 |
| H | -1.219997 | 1.357808  | -1.936846 |
| H | 0.678028  | 1.551467  | 1.241277  |
| H | -2.682470 | 0.557263  | -1.200974 |
| F | 3.051137  | 0.481852  | 0.177513  |
| H | 2.879751  | -1.446614 | -0.415142 |
| H | 0.677847  | 1.954791  | -0.550857 |
| H | -0.510969 | -1.647095 | 1.778825  |
| H | -1.922826 | -1.926764 | 0.719483  |
| H | -1.305712 | 0.491235  | 2.247704  |
| H | -2.744171 | 0.149920  | 1.265214  |

**TS 5 F Z**

SCF Energy: -485.170067687

Num. Imaginary Frequencies: 1

Imaginary Frequency: -522.6968

|   |           |           |           |
|---|-----------|-----------|-----------|
| O | 0.552972  | -0.641736 | 1.448079  |
| C | -0.095187 | -0.851341 | 0.337542  |
| C | 0.714649  | -1.471800 | -0.732455 |
| C | 1.814488  | -0.325846 | -1.134551 |
| C | 1.572411  | 0.840720  | -0.249309 |
| C | 1.814566  | 0.573856  | 1.121408  |
| C | 0.444948  | 1.591845  | -0.524809 |
| C | -1.037658 | 0.068776  | -0.042552 |
| C | -2.255571 | 0.492317  | -0.225914 |
| H | 1.539961  | 1.327149  | 1.848666  |
| H | 0.111935  | 1.717831  | -1.547714 |
| H | 2.676364  | -0.023097 | 1.389191  |
| H | -2.538275 | 1.446039  | -0.647535 |
| F | -3.335109 | -0.251609 | 0.115154  |
| H | 0.105672  | 2.336076  | 0.185286  |
| H | 0.134689  | -1.742779 | -1.610078 |
| H | 1.257517  | -2.332642 | -0.351719 |
| H | 1.665296  | -0.084660 | -2.183884 |
| H | 2.803177  | -0.756703 | -0.999394 |

**TS 5 H**

SCF Energy: -385.922289295

Num. Imaginary Frequencies: 1

Imaginary Frequency: -541.6310

|   |           |           |           |
|---|-----------|-----------|-----------|
| C | 0.185516  | -1.445257 | -0.690737 |
| C | -1.054396 | -0.904911 | -0.399702 |
| C | -1.409059 | 0.328793  | -1.147244 |
| C | -0.456128 | 1.519071  | -0.562519 |
| C | 0.377852  | 0.879390  | 0.481795  |
| C | 1.455166  | 0.140074  | 0.061055  |
| C | 2.728933  | -0.108797 | -0.092291 |
| C | -1.389673 | -0.848988 | 0.973985  |
| O | -0.294043 | 0.455866  | 1.517942  |
| H | -1.053882 | -1.650315 | 1.619941  |
| H | 0.582056  | -1.387382 | -1.697283 |
| H | -2.330867 | -0.398865 | 1.261617  |
| H | 3.074534  | -0.989106 | -0.619616 |
| H | 3.480182  | 0.560625  | 0.310375  |
| H | 0.596331  | -2.225400 | -0.061011 |
| H | 0.127918  | 1.951855  | -1.370542 |
| H | -1.101008 | 2.273173  | -0.118448 |
| H | -1.206430 | 0.239448  | -2.211768 |
| H | -2.445758 | 0.622793  | -1.002854 |

**TS 5 Me E**

SCF Energy: -425.233460121

Num. Imaginary Frequencies: 1

Imaginary Frequency: -536.5215

## 2 CARTESIAN COORDINATES

---

|   |           |           |           |
|---|-----------|-----------|-----------|
| O | -0.970936 | -0.792630 | -1.340354 |
| C | -0.283084 | -1.089496 | -0.271468 |
| C | -1.107453 | -1.246413 | 0.949892  |
| C | -1.722927 | 0.234694  | 1.253025  |
| C | -1.206649 | 1.133185  | 0.188964  |
| C | -1.700512 | 0.825149  | -1.099713 |
| C | 0.142557  | 1.432971  | 0.262060  |
| C | 0.972901  | -0.549283 | -0.130256 |
| C | 2.279986  | -0.638015 | -0.154582 |
| H | -1.278627 | 1.343090  | -1.951695 |
| H | 0.618417  | 1.539285  | 1.229481  |
| H | -2.741807 | 0.549979  | -1.205602 |
| C | 3.272602  | 0.441520  | 0.152837  |
| H | 2.699124  | -1.602182 | -0.433439 |
| H | 0.631672  | 1.930021  | -0.567680 |
| H | -0.536714 | -1.589367 | 1.808937  |
| H | -1.940617 | -1.918260 | 0.758847  |
| H | -1.388675 | 0.532982  | 2.243825  |
| H | -2.807653 | 0.159976  | 1.248145  |
| H | 3.919670  | 0.134868  | 0.975827  |
| H | 3.916576  | 0.617144  | -0.710053 |
| H | 2.791595  | 1.377639  | 0.421689  |

### TS 5 Me Z

SCF Energy: -425.233956287

Num. Imaginary Frequencies: 1

Imaginary Frequency: -531.0946

|   |           |           |           |
|---|-----------|-----------|-----------|
| O | 0.563558  | -0.601598 | 1.456341  |
| C | -0.088308 | -0.819750 | 0.343544  |
| C | 0.725578  | -1.471076 | -0.708897 |
| C | 1.870443  | -0.375506 | -1.110976 |
| C | 1.637376  | 0.815662  | -0.255537 |
| C | 1.857872  | 0.570548  | 1.122178  |
| C | 0.506445  | 1.554793  | -0.555743 |
| C | -1.017307 | 0.108233  | -0.059469 |
| C | -2.235231 | 0.542973  | -0.259991 |
| H | 1.593811  | 1.345567  | 1.830722  |
| H | 0.182284  | 1.658490  | -1.584248 |
| H | 2.707698  | -0.034413 | 1.410896  |
| H | -2.373417 | 1.518990  | -0.715794 |
| C | -3.481346 | -0.214558 | 0.103709  |
| H | 0.165063  | 2.320516  | 0.130504  |
| H | 0.149854  | -1.738640 | -1.591118 |
| H | 1.231244  | -2.346409 | -0.308890 |
| H | 1.754251  | -0.153277 | -2.169061 |
| H | 2.844849  | -0.828152 | -0.944081 |
| H | -4.096013 | -0.380893 | -0.782111 |
| H | -3.238636 | -1.176476 | 0.549383  |
| H | -4.082576 | 0.359560  | 0.810162  |

### TS 5 NH2 E

SCF Energy: -441.284812690

Num. Imaginary Frequencies: 1

Imaginary Frequency: -538.1627

## 2 CARTESIAN COORDINATES

|   |           |           |           |
|---|-----------|-----------|-----------|
| O | -0.987302 | -0.780332 | -1.334741 |
| C | -0.273709 | -1.092533 | -0.276841 |
| C | -1.092624 | -1.256981 | 0.943724  |
| C | -1.676314 | 0.243992  | 1.265573  |
| C | -1.173757 | 1.135885  | 0.193612  |
| C | -1.680466 | 0.805438  | -1.092240 |
| C | 0.179632  | 1.426357  | 0.243823  |
| C | 0.970678  | -0.532628 | -0.144638 |
| C | 2.285245  | -0.601636 | -0.143303 |
| H | -1.275432 | 1.330906  | -1.948322 |
| H | 0.666423  | 1.545876  | 1.205357  |
| H | -2.730135 | 0.554570  | -1.179073 |
| N | 3.179061  | 0.398781  | 0.230743  |
| H | 2.758071  | -1.540779 | -0.411243 |
| H | 0.651209  | 1.925130  | -0.596305 |
| H | -0.525341 | -1.614849 | 1.798532  |
| H | -1.946278 | -1.903227 | 0.755065  |
| H | -1.311589 | 0.530722  | 2.248974  |
| H | -2.761523 | 0.180631  | 1.287136  |
| H | 4.075089  | 0.337110  | -0.227007 |
| H | 2.812391  | 1.337733  | 0.191349  |

### TS 5 NH2 Z

SCF Energy: -441.283737053

Num. Imaginary Frequencies: 1

Imaginary Frequency: -531.4973

|   |           |           |           |
|---|-----------|-----------|-----------|
| O | 0.585260  | -0.666462 | 1.426439  |
| C | -0.078114 | -0.851770 | 0.309371  |
| C | 0.747024  | -1.447341 | -0.765074 |
| C | 1.846117  | -0.290072 | -1.142252 |
| C | 1.597344  | 0.851702  | -0.228595 |
| C | 1.830543  | 0.536831  | 1.136591  |
| C | 0.448375  | 1.582080  | -0.480550 |
| C | -1.021622 | 0.076588  | -0.052316 |
| C | -2.256382 | 0.499211  | -0.216277 |
| H | 1.563309  | 1.275106  | 1.882515  |
| H | 0.117717  | 1.736332  | -1.500622 |
| H | 2.702830  | -0.054369 | 1.385223  |
| H | -2.436600 | 1.484592  | -0.631574 |
| N | -3.417336 | -0.176249 | 0.172622  |
| H | 0.104371  | 2.307838  | 0.246286  |
| H | 0.176357  | -1.706572 | -1.652749 |
| H | 1.294148  | -2.312228 | -0.398323 |
| H | 1.695302  | -0.024412 | -2.185851 |
| H | 2.837103  | -0.720388 | -1.019367 |
| H | -4.208256 | 0.003082  | -0.427929 |
| H | -3.286722 | -1.166912 | 0.317145  |

### TS 5 NO2 E

SCF Energy: -590.439220850

Num. Imaginary Frequencies: 1

Imaginary Frequency: -504.0064

|   |           |           |           |
|---|-----------|-----------|-----------|
| O | -1.558750 | -1.019769 | -1.217249 |
| C | -0.903486 | -1.146697 | -0.115215 |
| C | -1.712789 | -1.112304 | 1.125614  |
| C | -2.294021 | 0.403612  | 1.209471  |
| C | -1.779085 | 1.135885  | 0.020693  |
| C | -2.289068 | 0.680201  | -1.209955 |
| C | -0.443917 | 1.484423  | 0.041491  |
| C | 0.367177  | -0.622373 | -0.052959 |
| C | 1.640443  | -0.923100 | -0.100520 |
| H | -1.853190 | 1.049566  | -2.128684 |
| H | 0.053372  | 1.710320  | 0.974790  |
| H | -3.323159 | 0.370869  | -1.275068 |
| N | 2.701623  | 0.075234  | 0.025811  |
| H | 2.053823  | -1.910410 | -0.237623 |
| H | 0.048164  | 1.841875  | -0.854407 |
| H | -1.136381 | -1.338923 | 2.018215  |
| H | -2.553803 | -1.794355 | 1.033537  |
| H | -1.944414 | 0.840259  | 2.141184  |
| H | -3.379158 | 0.346478  | 1.223720  |
| O | 3.836611  | -0.352316 | -0.045817 |
| O | 2.423621  | 1.242061  | 0.189557  |

### TS 5 NO2 Z

SCF Energy: -590.440453509

Num. Imaginary Frequencies: 1

Imaginary Frequency: -509.6648

|   |           |           |           |
|---|-----------|-----------|-----------|
| O | 1.054905  | -0.922448 | 1.252648  |
| C | 0.457807  | -0.812039 | 0.107814  |
| C | 1.250145  | -1.234101 | -1.067591 |
| C | 2.470442  | -0.151187 | -1.158142 |
| C | 2.296886  | 0.799807  | -0.029833 |
| C | 2.460140  | 0.213301  | 1.246691  |
| C | 1.266643  | 1.711270  | -0.148851 |
| C | -0.383043 | 0.254334  | -0.066567 |
| C | -1.565331 | 0.798769  | -0.156454 |
| H | 2.216777  | 0.799643  | 2.123006  |
| H | 0.985044  | 2.094951  | -1.121886 |
| H | 3.239033  | -0.523693 | 1.388242  |
| H | -1.794759 | 1.835700  | -0.340740 |
| N | -2.784723 | -0.007276 | 0.002546  |
| H | 0.959410  | 2.300108  | 0.707249  |
| H | 0.682844  | -1.228399 | -1.994032 |
| H | 1.683287  | -2.214899 | -0.891611 |
| H | 2.399723  | 0.340505  | -2.124717 |
| H | 3.405453  | -0.701724 | -1.099776 |
| O | -3.831889 | 0.601973  | -0.084350 |
| O | -2.698752 | -1.196048 | 0.203458  |

**TS 5 OH E**

SCF Energy: -461.155106156

Num. Imaginary Frequencies: 1

Imaginary Frequency: -531.8614

|   |           |           |           |
|---|-----------|-----------|-----------|
| O | -0.967965 | -0.763658 | -1.347318 |
| C | -0.269724 | -1.094624 | -0.286176 |
| C | -1.096448 | -1.271635 | 0.925951  |
| C | -1.670242 | 0.231470  | 1.260685  |
| C | -1.152802 | 1.135519  | 0.205637  |
| C | -1.648594 | 0.824165  | -1.090308 |
| C | 0.198194  | 1.428502  | 0.273027  |
| C | 0.969007  | -0.532332 | -0.132295 |
| C | 2.278181  | -0.579187 | -0.145921 |
| H | -1.231315 | 1.358517  | -1.934868 |
| H | 0.687682  | 1.525085  | 1.234494  |
| H | -2.698591 | 0.580336  | -1.191412 |
| O | 3.052690  | 0.496070  | 0.182775  |
| H | 2.808000  | -1.482464 | -0.427269 |
| H | 0.688670  | 1.925798  | -0.555512 |
| H | -0.536865 | -1.643209 | 1.779878  |
| H | -1.952809 | -1.909583 | 0.723320  |
| H | -1.311866 | 0.502226  | 2.250799  |
| H | -2.755892 | 0.174310  | 1.271863  |
| H | 3.979747  | 0.258421  | 0.101450  |

**TS 5 OH Z**

SCF Energy: -461.153021060

Num. Imaginary Frequencies: 1

Imaginary Frequency: -528.3923

|   |           |           |           |
|---|-----------|-----------|-----------|
| O | 0.600398  | -0.629308 | 1.449199  |
| C | -0.071571 | -0.851483 | 0.348063  |
| C | 0.738076  | -1.469877 | -0.724048 |
| C | 1.820097  | -0.312988 | -1.148562 |
| C | 1.576743  | 0.852372  | -0.263213 |
| C | 1.833967  | 0.581088  | 1.106397  |
| C | 0.425813  | 1.576105  | -0.520584 |
| C | -1.027753 | 0.057339  | -0.024768 |
| C | -2.260393 | 0.460047  | -0.212470 |
| H | 1.568779  | 1.336577  | 1.835365  |
| H | 0.079289  | 1.698915  | -1.539539 |
| H | 2.711930  | 0.000916  | 1.360049  |
| H | -2.480866 | 1.426376  | -0.650928 |
| O | -3.343834 | -0.300032 | 0.134724  |
| H | 0.087710  | 2.318844  | 0.191699  |
| H | 0.154284  | -1.756212 | -1.594443 |
| H | 1.297931  | -2.320156 | -0.343233 |
| H | 1.651114  | -0.077443 | -2.196441 |
| H | 2.816086  | -0.732043 | -1.028676 |
| H | -4.148645 | 0.183333  | -0.070127 |

**TS 5 OMe E**

SCF Energy: -500.446348738

Num. Imaginary Frequencies: 1

Imaginary Frequency: -531.2574

|   |           |           |           |
|---|-----------|-----------|-----------|
| O | -1.452142 | -0.749867 | -1.341880 |
| C | -0.753391 | -1.096977 | -0.286127 |
| C | -1.574191 | -1.252344 | 0.933077  |
| C | -2.107705 | 0.264856  | 1.270788  |
| C | -1.577356 | 1.154674  | 0.210026  |
| C | -2.091613 | 0.853717  | -1.081258 |
| C | -0.219001 | 1.414036  | 0.265233  |
| C | 0.499833  | -0.565068 | -0.143181 |
| C | 1.808498  | -0.646488 | -0.165681 |
| H | -1.668812 | 1.376907  | -1.930047 |
| H | 0.281683  | 1.499069  | 1.221988  |
| H | -3.148086 | 0.635552  | -1.173080 |
| O | 2.615873  | 0.398712  | 0.155245  |
| H | 2.313414  | -1.565473 | -0.450363 |
| H | 0.276747  | 1.897312  | -0.568431 |
| H | -1.017030 | -1.637047 | 1.782759  |
| H | -2.447597 | -1.869187 | 0.737937  |
| H | -1.733925 | 0.527832  | 2.257304  |
| H | -3.194290 | 0.234534  | 1.291621  |
| C | 4.005008  | 0.124239  | 0.042095  |
| H | 4.527451  | 1.032950  | 0.324622  |
| H | 4.295301  | -0.685961 | 0.712820  |
| H | 4.264803  | -0.141118 | -0.983888 |

**TS 5 OMe Z**

SCF Energy: -500.444323122  
Num. Imaginary Frequencies: 1  
Imaginary Frequency: -526.7581

|   |           |           |           |
|---|-----------|-----------|-----------|
| O | 1.090689  | -0.586460 | 1.467429  |
| C | 0.432868  | -0.868578 | 0.371588  |
| C | 1.273116  | -1.475159 | -0.683735 |
| C | 2.302026  | -0.280504 | -1.134940 |
| C | 2.001192  | 0.894825  | -0.280876 |
| C | 2.266637  | 0.671810  | 1.095841  |
| C | 0.818328  | 1.556504  | -0.559424 |
| C | -0.563332 | -0.015017 | -0.025688 |
| C | -1.813136 | 0.318558  | -0.241888 |
| H | 1.963458  | 1.432495  | 1.804294  |
| H | 0.469671  | 1.635721  | -1.581945 |
| H | 3.170227  | 0.140708  | 1.366411  |
| H | -2.077326 | 1.264292  | -0.706336 |
| O | -2.861018 | -0.489466 | 0.082249  |
| H | 0.443221  | 2.301094  | 0.132131  |
| H | 0.705315  | -1.809465 | -1.547588 |
| H | 1.870361  | -2.289232 | -0.281134 |
| H | 2.126602  | -0.080305 | -2.189085 |
| H | 3.315900  | -0.649544 | -1.001375 |
| C | -4.126859 | 0.154829  | 0.042754  |
| H | -4.872549 | -0.606163 | 0.251454  |
| H | -4.186010 | 0.940289  | 0.797777  |
| H | -4.311272 | 0.583916  | -0.943823 |

**TS 5 tBut E**

SCF Energy: -543.155884128  
Num. Imaginary Frequencies: 1  
Imaginary Frequency: -520.8730



## 2 CARTESIAN COORDINATES

---

|   |           |           |           |   |           |           |           |
|---|-----------|-----------|-----------|---|-----------|-----------|-----------|
| C | 2.773757  | 0.913996  | 0.991089  | O | -1.506472 | 0.259469  | 1.525763  |
| O | 1.959725  | -0.686112 | 1.435609  | C | -0.870538 | 0.672515  | 0.462541  |
| C | 1.271808  | -1.061303 | 0.405514  | C | -1.674740 | 1.555593  | -0.415757 |
| C | 2.085607  | -1.374594 | -0.797790 | C | -2.870765 | 0.612615  | -1.001679 |
| C | 2.732705  | 0.034591  | -1.273914 | C | -2.672628 | -0.738675 | -0.415112 |
| C | 2.259198  | 1.063072  | -0.308116 | C | -2.863429 | -0.778577 | 0.986214  |
| C | -0.001014 | -0.561812 | 0.217707  | C | -1.579515 | -1.441350 | -0.889725 |
| C | -1.288527 | -0.796319 | 0.322820  | C | 0.022519  | -0.177384 | -0.140447 |
| C | -2.521371 | 0.013644  | -0.015237 | C | 1.213888  | -0.610237 | -0.462797 |
| C | 0.923081  | 1.409222  | -0.402426 | H | -2.615843 | -1.690347 | 1.514992  |
| H | 2.372239  | 1.524916  | 1.789011  | H | -1.273853 | -1.339154 | -1.923909 |
| H | 0.436504  | 1.427745  | -1.367392 | H | -3.679024 | -0.212085 | 1.416548  |
| H | 3.799229  | 0.595369  | 1.122250  | H | 1.298210  | -1.479231 | -1.112617 |
| H | -1.537134 | -1.766768 | 0.755403  | C | 2.539309  | -0.021200 | -0.014478 |
| H | 0.467597  | 2.004018  | 0.379621  | H | -1.255068 | -2.342603 | -0.383563 |
| H | 1.498357  | -1.803478 | -1.605639 | H | -1.100772 | 1.974785  | -1.238392 |
| H | 2.898639  | -2.044676 | -0.528805 | H | -2.132676 | 2.351180  | 0.166851  |
| H | 2.388388  | 0.234742  | -2.285778 | H | -2.785119 | 0.607818  | -2.085746 |
| H | 3.815482  | -0.065213 | -1.279392 | H | -3.822750 | 1.056033  | -0.719872 |
| C | -3.474139 | -0.905796 | -0.790885 | C | 3.325136  | 0.378951  | -1.268631 |
| C | -3.188558 | 0.423669  | 1.304350  | C | 2.352224  | 1.193414  | 0.886033  |
| C | -2.244292 | 1.255886  | -0.853391 | C | 3.310954  | -1.111519 | 0.737759  |
| H | -3.190905 | 1.733805  | -1.110894 | H | 4.297490  | -0.742778 | 1.024309  |
| H | -1.643196 | 1.982515  | -0.310566 | H | 2.778049  | -1.409323 | 1.641649  |
| H | -1.733164 | 0.997575  | -1.781465 | H | 3.446332  | -1.995302 | 0.111945  |
| H | -4.126593 | 0.944460  | 1.103326  | H | 3.326025  | 1.584898  | 1.183947  |
| H | -3.408642 | -0.450819 | 1.918785  | H | 1.806345  | 1.984303  | 0.369344  |
| H | -2.538263 | 1.088546  | 1.874282  | H | 1.794931  | 0.932141  | 1.786652  |
| H | -4.407839 | -0.382862 | -1.003495 | H | 4.310501  | 0.755994  | -0.989065 |
| H | -3.029594 | -1.214532 | -1.738212 | H | 3.463500  | -0.476867 | -1.931538 |
| H | -3.708446 | -1.801994 | -0.214255 | H | 2.801011  | 1.159907  | -1.821171 |

### TS 5 tBut Z

SCF Energy: -543.162760692

Num. Imaginary Frequencies: 1

Imaginary Frequency: -524.5402

### 3 NBO Secondary Interactions

**Table 1:** Main NBO Secondary Interactions for the [3,3] sigmatropic rearrangement (kcal/mol)

| R                     | TS 5 E                                                            |                                                                   | TS 5 Z                                                            |                                                                   |
|-----------------------|-------------------------------------------------------------------|-------------------------------------------------------------------|-------------------------------------------------------------------|-------------------------------------------------------------------|
|                       | $\pi\text{C}_2\text{-C}_8 \rightarrow \pi^*\text{C}_5\text{-C}_7$ | $\pi\text{C}_5\text{-C}_7 \rightarrow \pi^*\text{C}_2\text{-C}_8$ | $\pi\text{C}_2\text{-C}_8 \rightarrow \pi^*\text{C}_5\text{-C}_7$ | $\pi\text{C}_5\text{-C}_7 \rightarrow \pi^*\text{C}_2\text{-C}_8$ |
| <b>NO<sub>2</sub></b> | 23.37                                                             | 6.38                                                              | 24.03                                                             | 9.07                                                              |
| <b>CHO</b>            | 25.14                                                             | 8.69                                                              | 27.98                                                             | 13.09                                                             |
| <b>BH<sub>2</sub></b> | 25.72                                                             | 8.84                                                              | 27.24                                                             | 11.59                                                             |
| <b>CN</b>             | 26.99                                                             | 11.57                                                             | 26.63                                                             | 12.04                                                             |
| <b>H</b>              | 27.63                                                             | 10.89                                                             | 27.63                                                             | 10.89                                                             |
| <b>Me</b>             | 28.07                                                             | 10.23                                                             | 28.22                                                             | 11.36                                                             |
| <b>tBu</b>            | 25.77                                                             | 6.20                                                              | 27.33                                                             | 10.07                                                             |
| <b>NH<sub>2</sub></b> | 30.65                                                             | 12.45                                                             | 29.53                                                             | 11.85                                                             |
| <b>OH</b>             | 29.05                                                             | 12.45                                                             | 28.28                                                             | 11.15                                                             |
| <b>OMe</b>            | 28.98                                                             | 12.47                                                             | 28.18                                                             | 11.25                                                             |
| <b>F</b>              | 30.27                                                             | 11.20                                                             | 26.01                                                             | 10.06                                                             |

### References

- (1) FRISCH, M. J., TRUCKS, G. W., SCHLEGEL, H. B., SCUSERIA, G. E., ROBB, M. A., CHEESEMAN, J. R., SCALMANI, G., BARONE, V., MENNUCCI, B., PETERSSON, G. A., NAKATSUJI, H., CARICATO, M., LI, X., HRATCHIAN, H. P., IZMAYLOV, A. F., BLOINO, J., ZHENG, G., SONNENBERG, J. L., HADA, M., EHARA, M., TOYOTA, K., FUKUDA, R., HASEGAWA, J., ISHIDA, M., NAKAJIMA, T., HONDA, Y., KITAO, O., NAKAI, H., VREVEN, T., MONTGOMERY, J. A., JR., PERALTA, J. E., OGLIARO, F., BEARPARK, M., HEYD, J. J., BROTHERS, E., KUDIN, K. N., STAROVEROV, V. N., KOBAYASHI, R., NORMAND, J., RAGHAVACHARI, K., RENDELL, A., BURANT, J. C., IYENGAR, S. S., TOMASI, J., COSSI, M., REGA, N., MILLAM, J. M., KLENE, M., KNOX, J. E., CROSS, J. B., BAKKEN, V., ADAMO, C., JARAMILLO, J., GOMPERTS, R., STRATMANN, R. E., YAZYEV, O., AUSTIN, A. J., CAMMI, R., POMELLI, C., OCHTERSKI, J. W., MARTIN, R. L., MOROKUMA, K., ZAKRZEWSKI, V. G., VOTH, G. A., SALVADOR, P., DANNENBERG, J. J., DAPPRICH, S., DANIELS, A. D., FARKAS, ., FORESMAN, J. B., ORTIZ, J. V., CIOSLOWSKI, J., AND FOX, D. J. Gaussian09 revision d.01. Gaussian Inc. Wallingford CT 2013.
